# Supplementary material
Source: MDPI journal article supplement (https://www.mdpi.com/2673-8856/3/2/6)
Supplement: s1 [file s1]

# Supporting Information

## Exploration of the DNA Photocleavage Activity of O-Halo-Phenyl Carbamoyl Amidoximes: Studies of the UVA-Induced Effects on a Major Crop Pest, the Whitefly *Bemisia tabaci*

Anastasios Panagopoulos <sup>1</sup>, Konstantina Alipranti <sup>2</sup>, Kyriaki Mylona <sup>2</sup>, Polinikis Paisidis <sup>3</sup>,  
Stergios Rizos <sup>3</sup>, Alexandros E. Koumbis <sup>3</sup>, Emmanouil Roditakis <sup>2,4</sup> and Konstantina C. Fylaktakidou <sup>1,3,4,\*</sup>

<sup>1</sup> Laboratory of Organic, Bioorganic and Natural Product Chemistry, Molecular Biology and Genetics Department, Democritus University of Thrace, 68100 Alexandroupolis, Greece

<sup>2</sup> Department of Agriculture, School of Agricultural Sciences, Hellenic Mediterranean University, Gianni Kornarou, Estavromenos 1, 714 10 Heraklion, Greece

<sup>3</sup> Laboratory of Organic Chemistry, Chemistry Department, Aristotle University of Thessaloniki, 54124 Thessaloniki, Greece

<sup>4</sup> Institute of Agri-Food and Life Sciences Agro-Health, Hellenic Mediterranean University Research Center, 71410 Heraclion, Greece

\* Correspondence: kfylakta@chem.auth.gr

## Table of contents

|           |                                                                                                                                                                                                                                                                                                                                                                                                                               |            |
|-----------|-------------------------------------------------------------------------------------------------------------------------------------------------------------------------------------------------------------------------------------------------------------------------------------------------------------------------------------------------------------------------------------------------------------------------------|------------|
| <b>S1</b> | <b><i>A. Copies of NMR spectra of compounds 16-29 and 32</i></b><br><b><i>B. Copies of HRMS measurements</i></b>                                                                                                                                                                                                                                                                                                              | S3<br>S18  |
| <b>S2</b> | <b><i>A. Copies of UV-Vis spectra of compounds 16-29 and 32</i></b><br><b><i>B. Copies of UV-Vis spectra of compounds 17, 22, 26 and 28 upon increasing amounts of CT-DNA</i></b>                                                                                                                                                                                                                                             | S22<br>S25 |
| <b>S3</b> | <b><i>Gel electrophoresis pictures and plots</i></b><br><i>S.3.A. Gel electrophoresis picture of the UVB irradiation of plasmid DNA with compounds 18-20</i><br><i>S.3.B. Concentration dependence of the DNA damage of compound 22</i><br><i>S.3.C. Gel electrophoresis picture of plasmid DNA with compounds 22-29 in dark</i><br><i>S.3.D. Gel electrophoresis picture of compounds 16-29 and 32 under UVA irradiation</i> | S26        |
| <b>S4</b> | <b><i>Gel electrophoresis pictures uncropped</i></b>                                                                                                                                                                                                                                                                                                                                                                          | S28        |

*S1A Copies of NMR spectra of compounds 16-29 and 32*

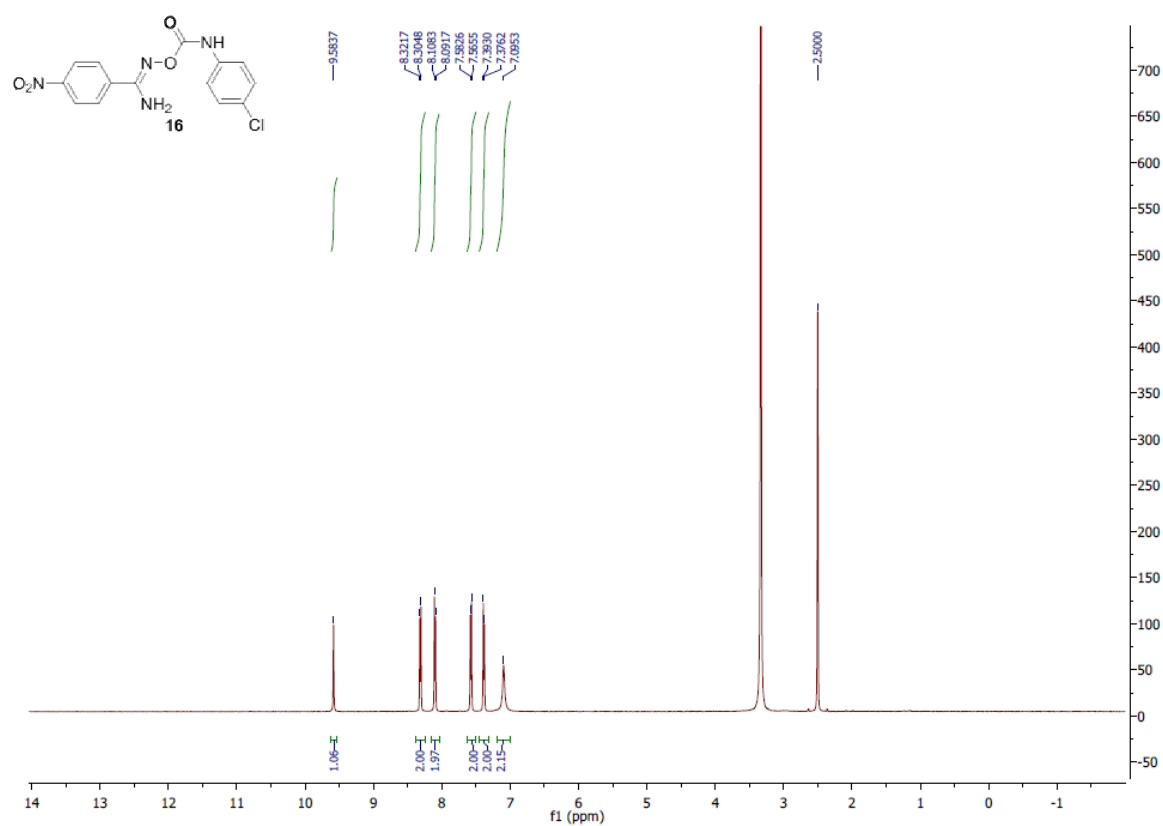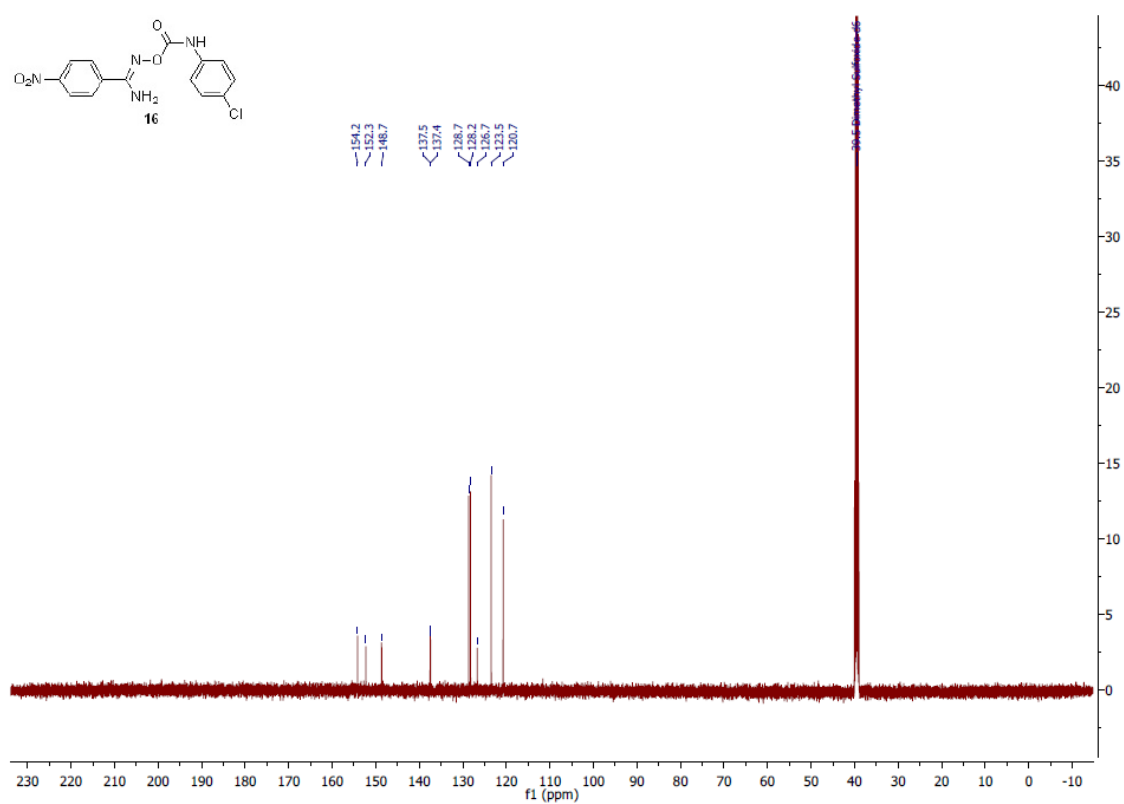

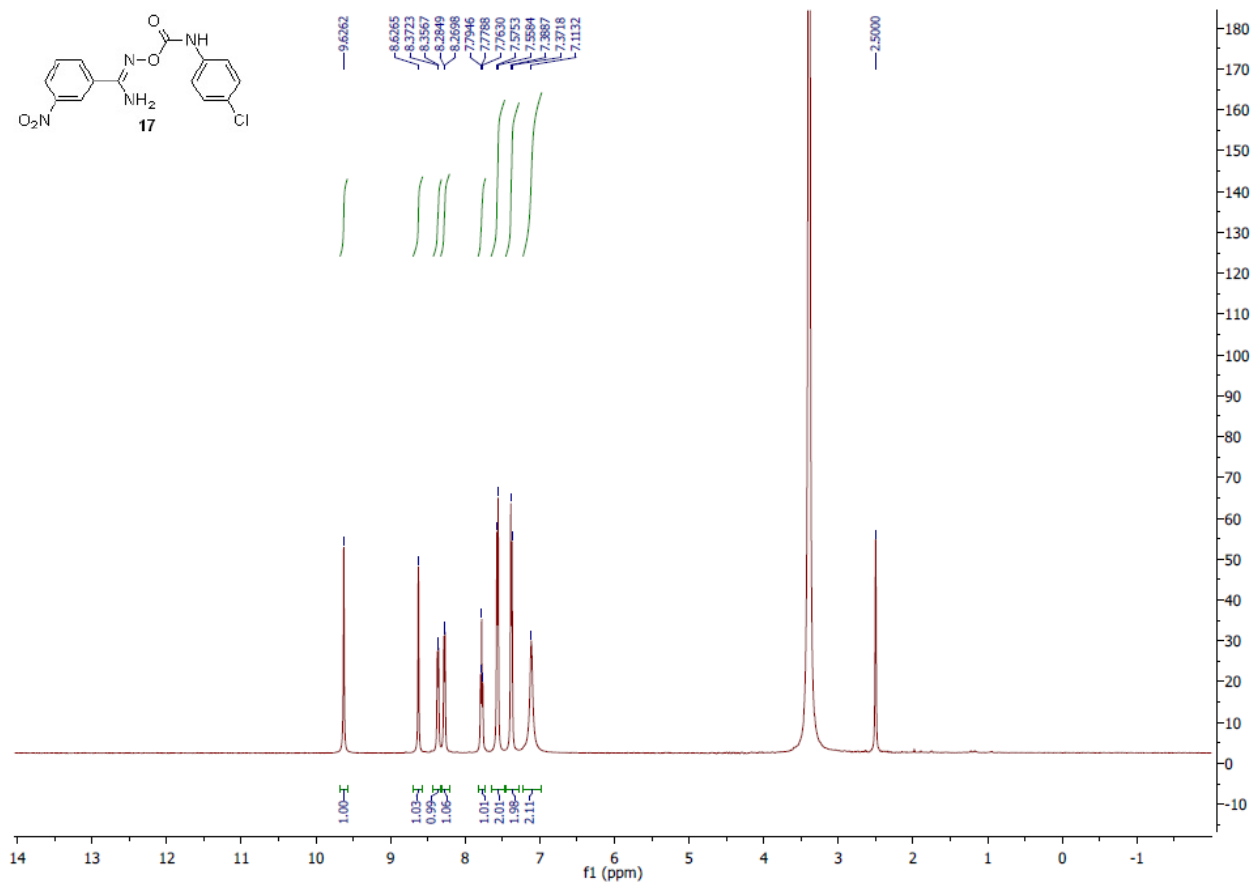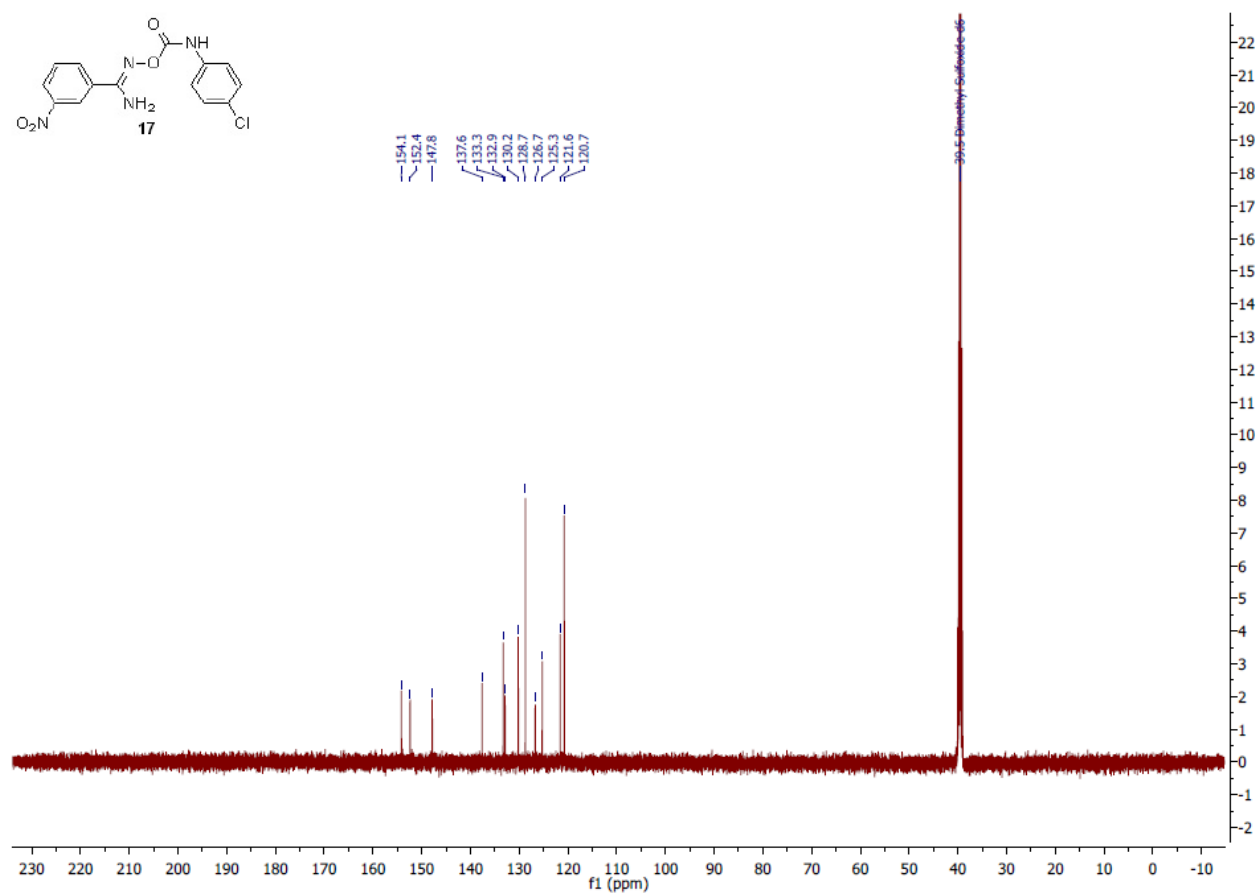

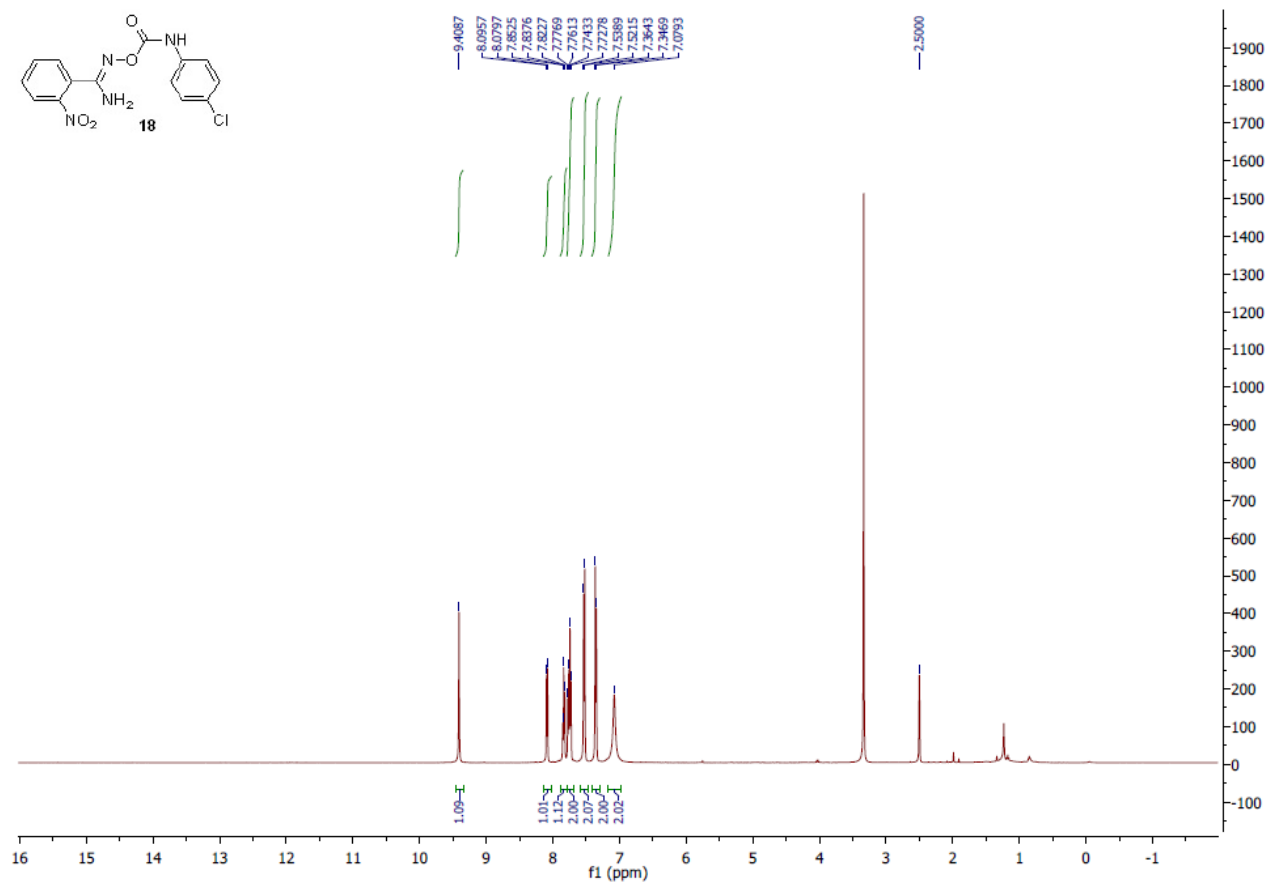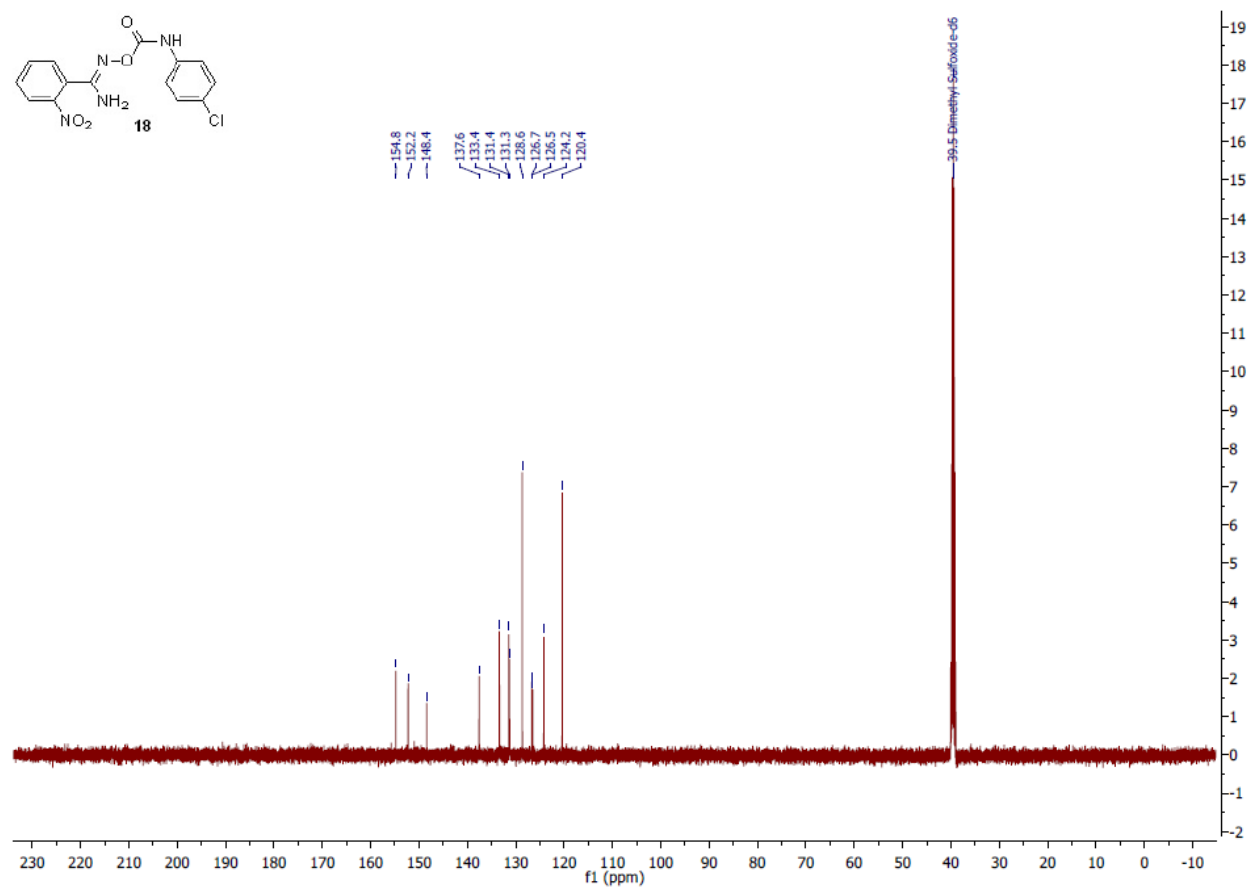

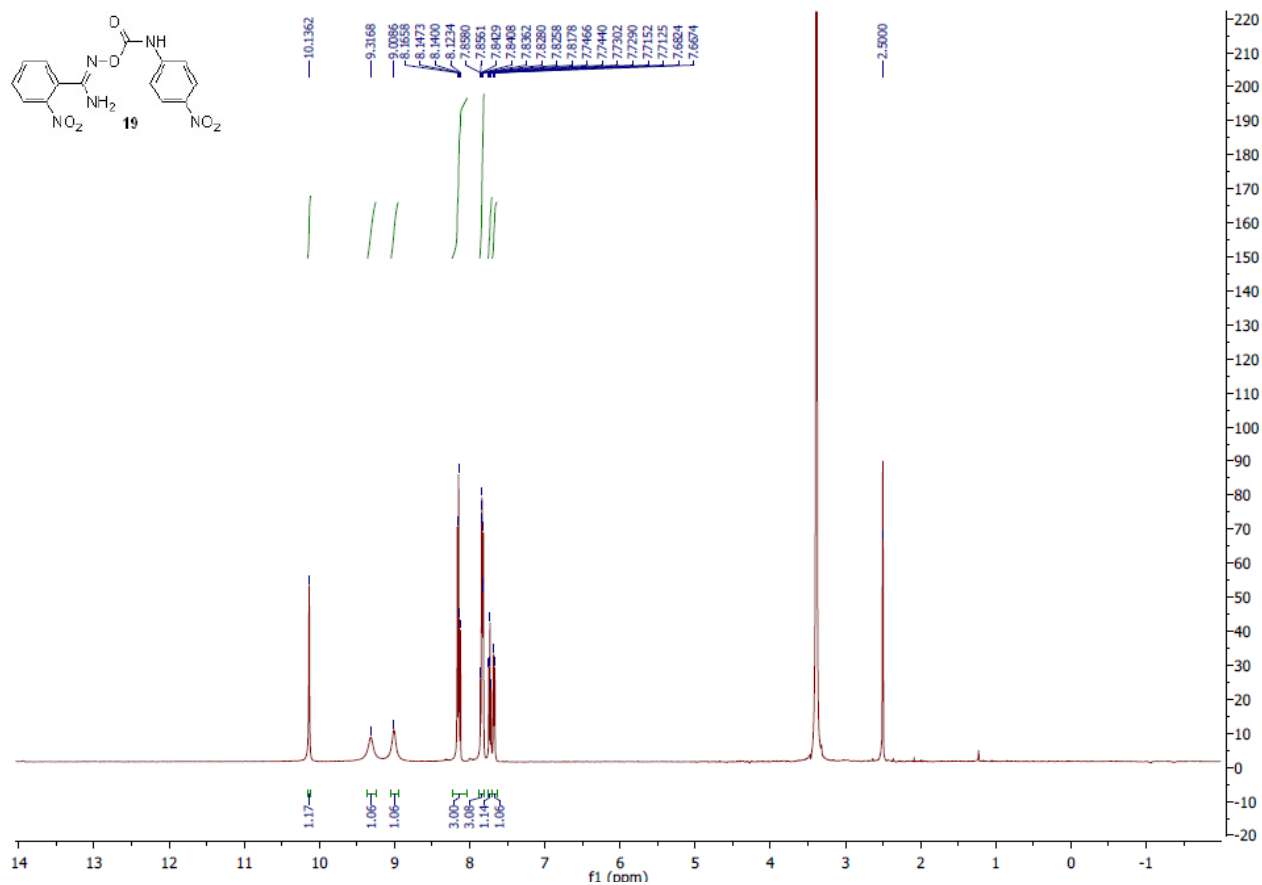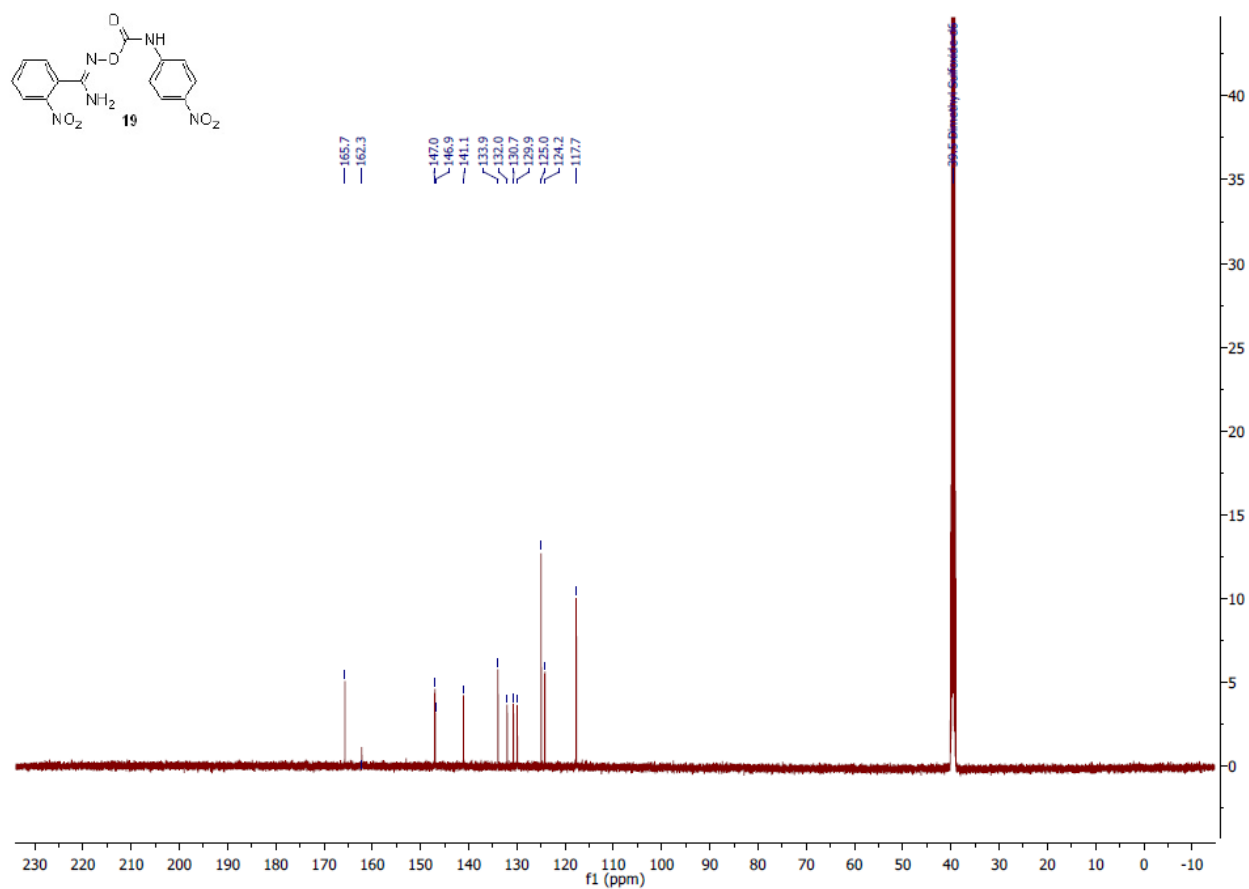

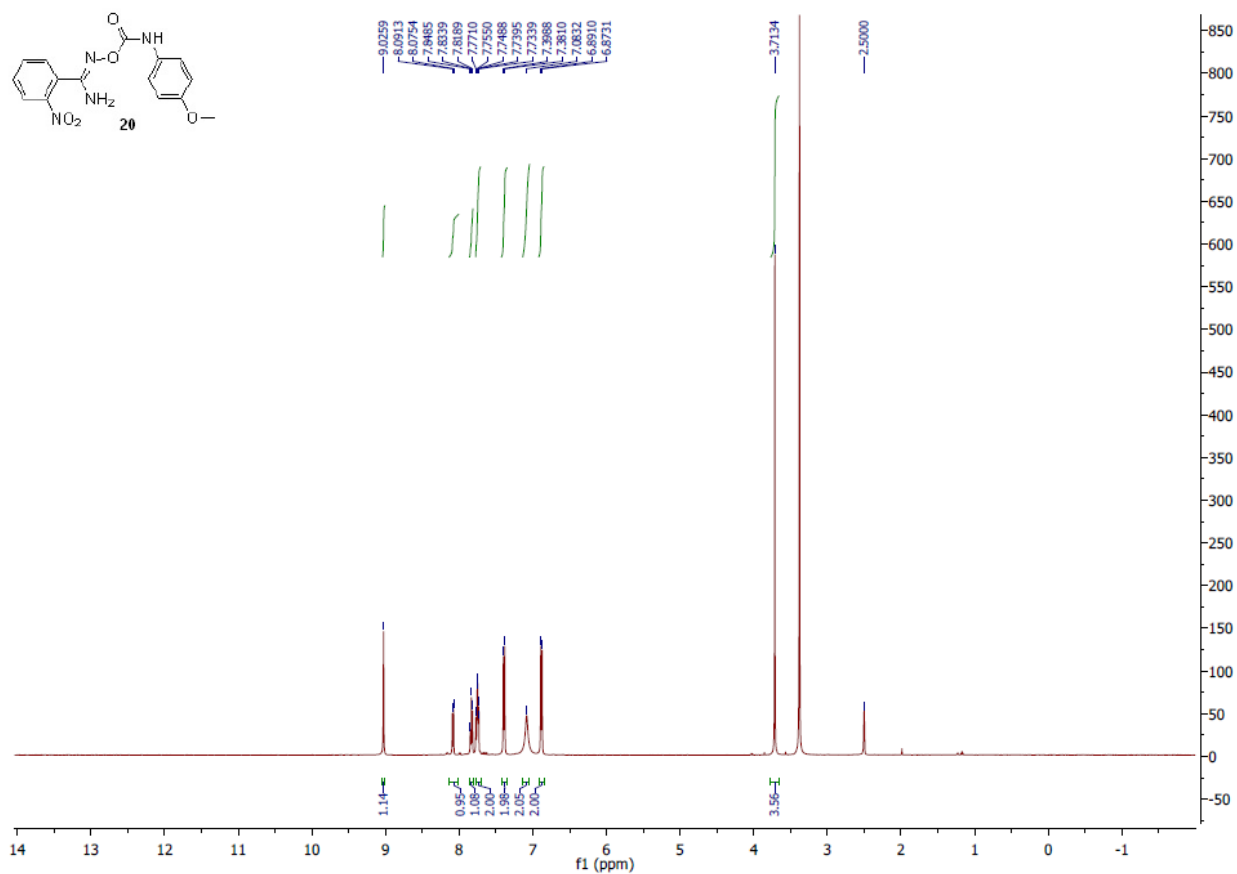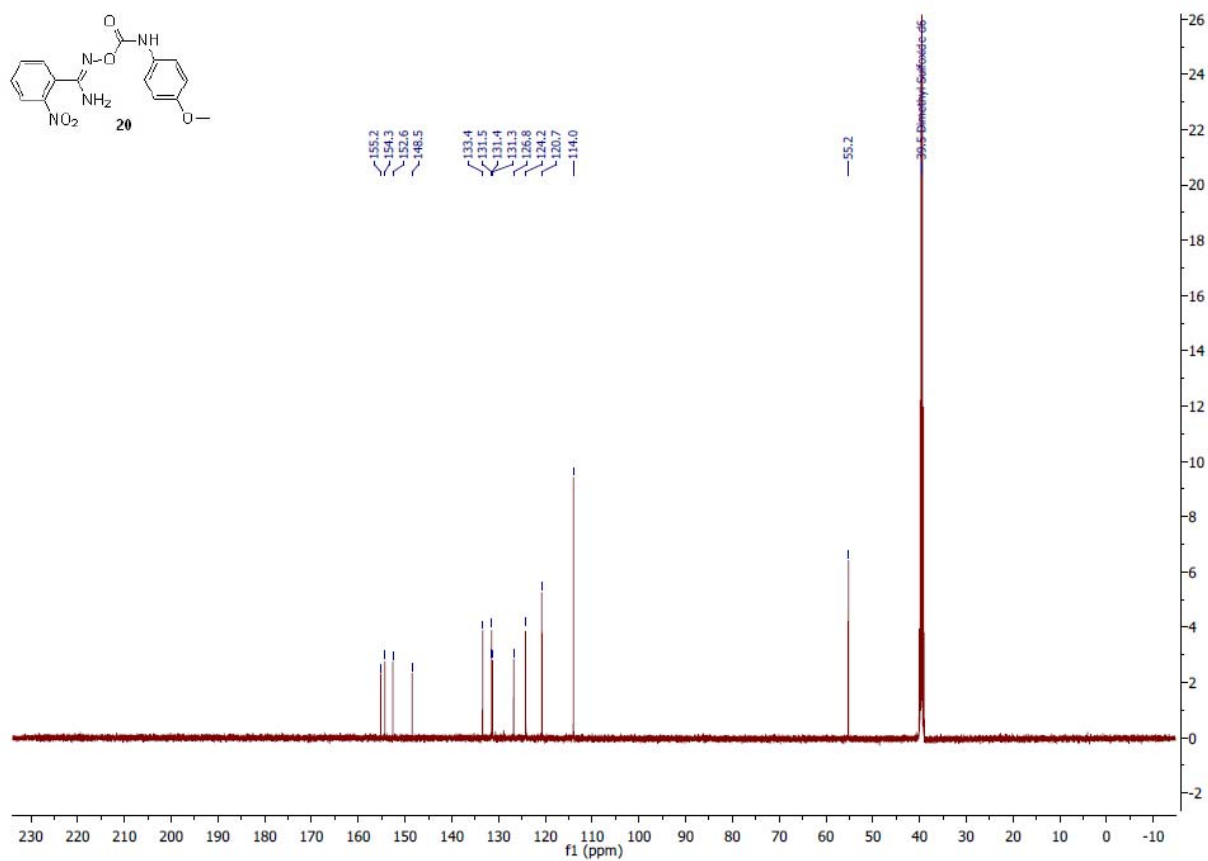

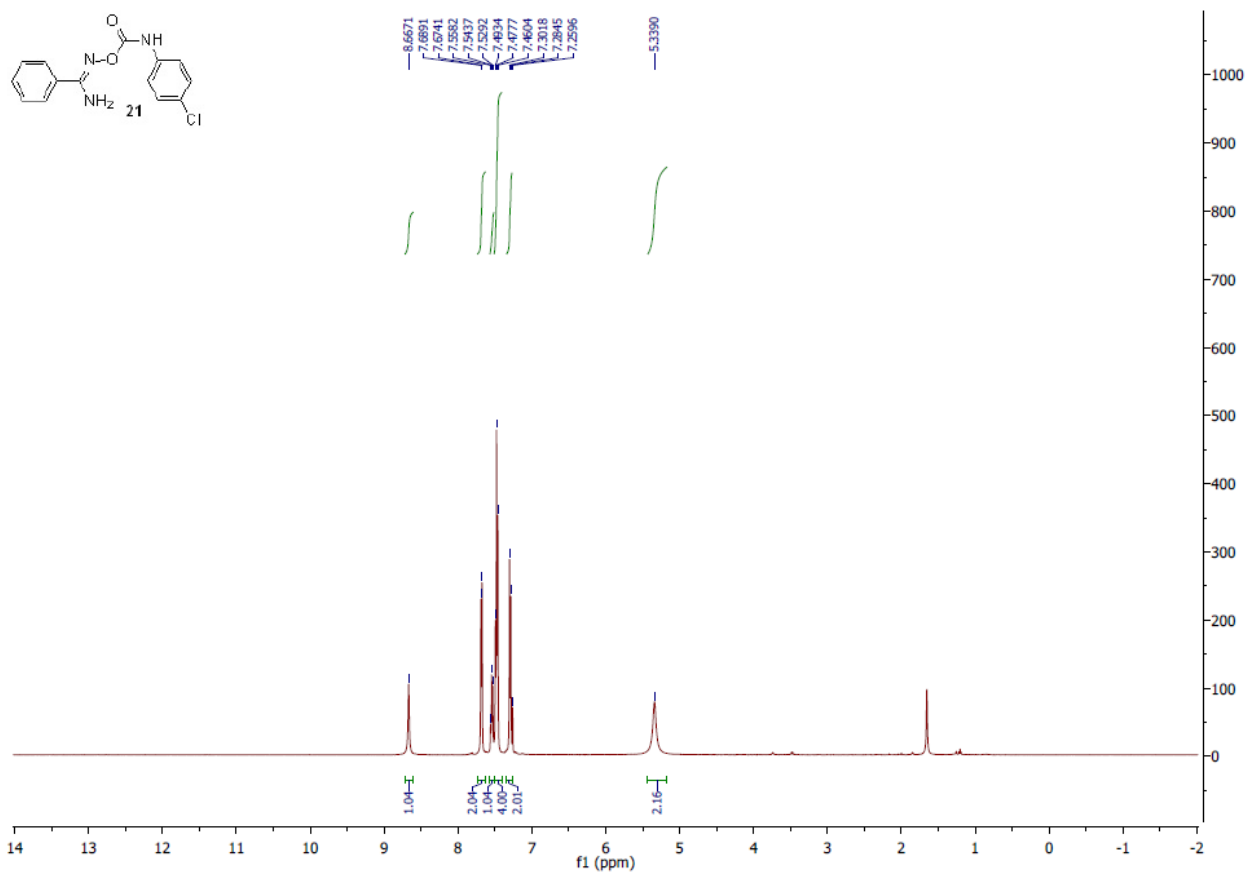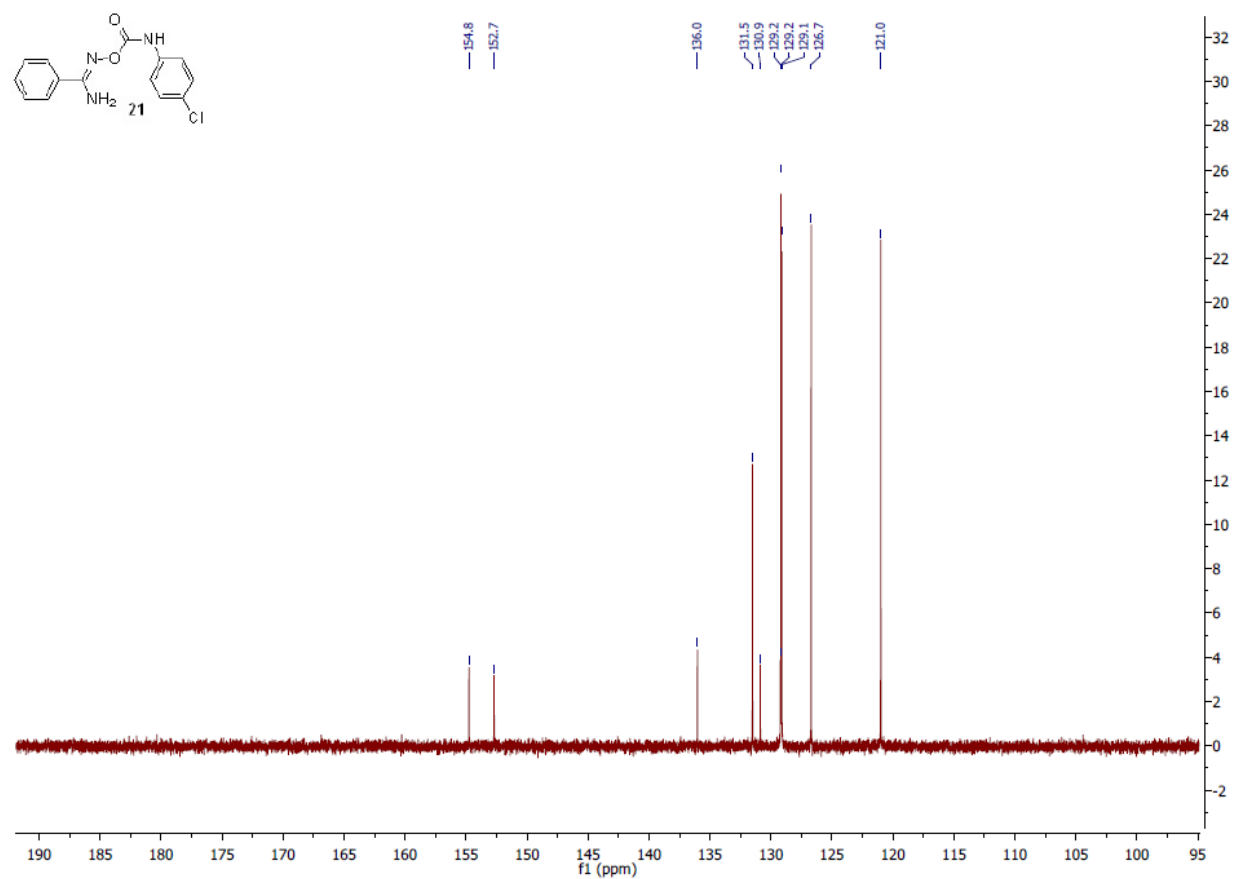



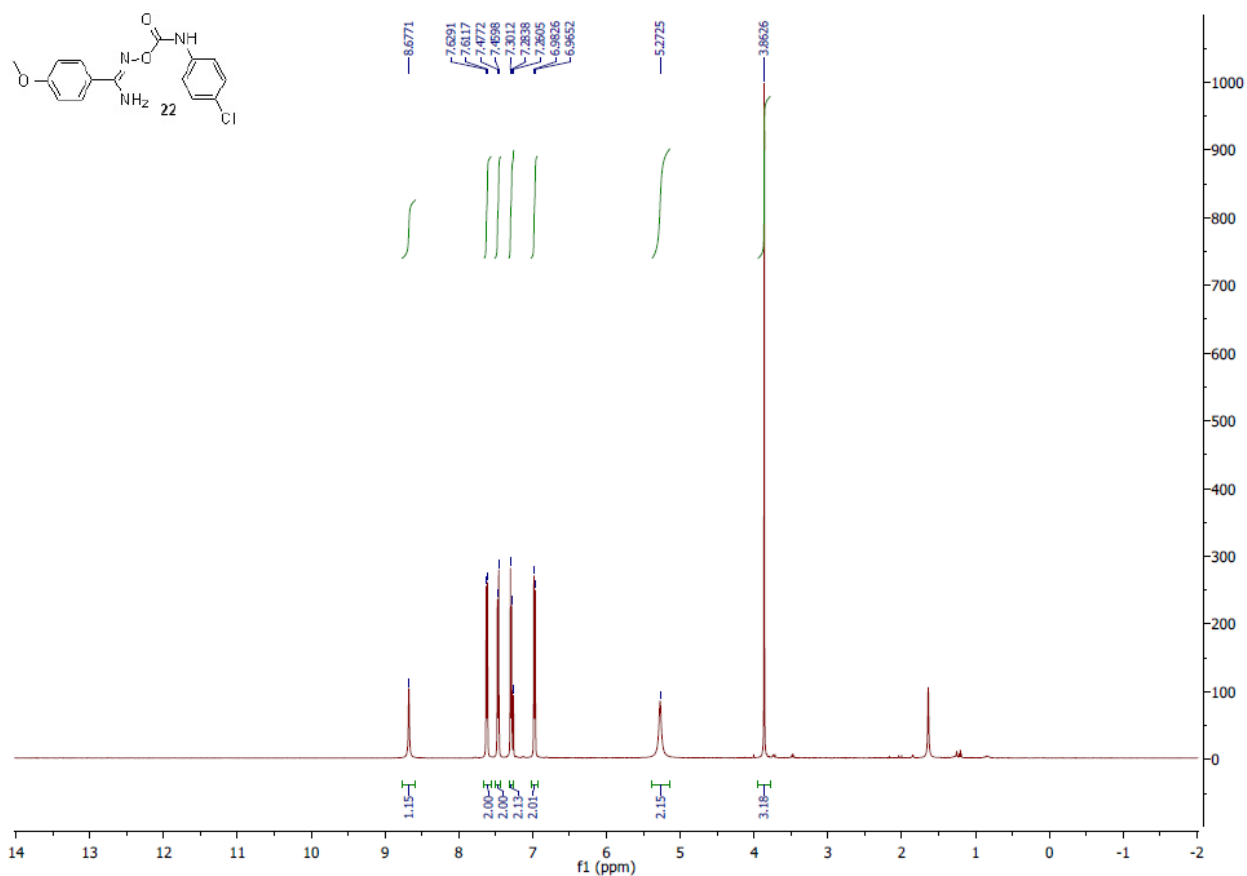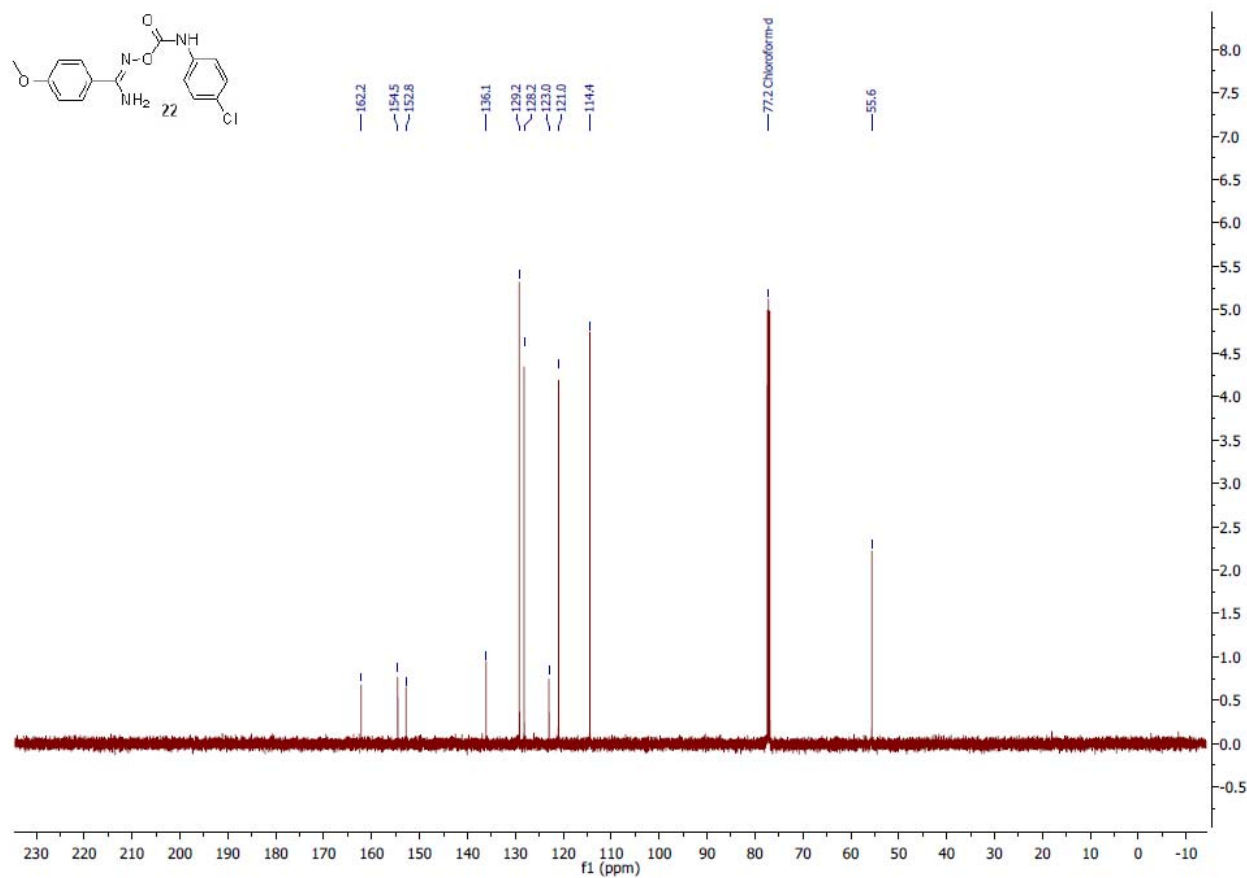

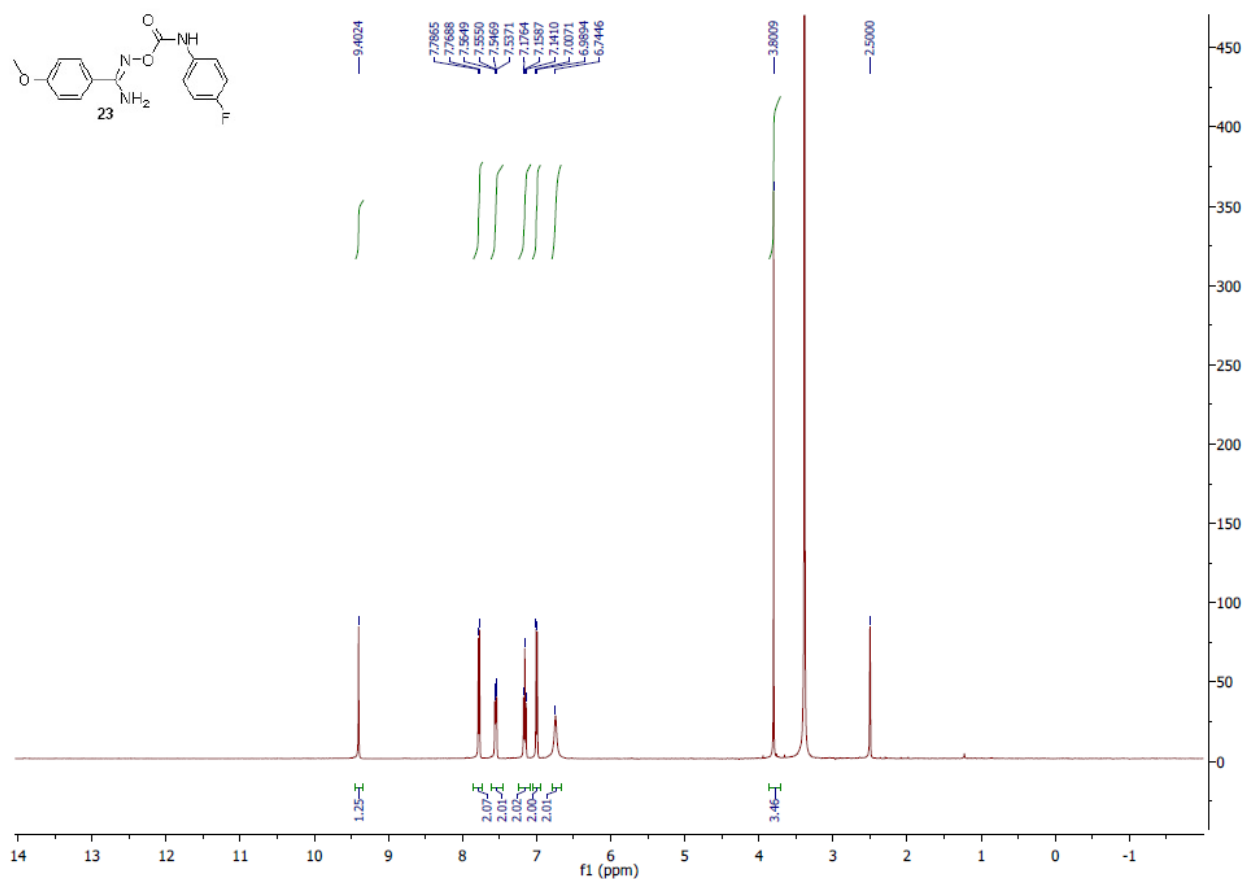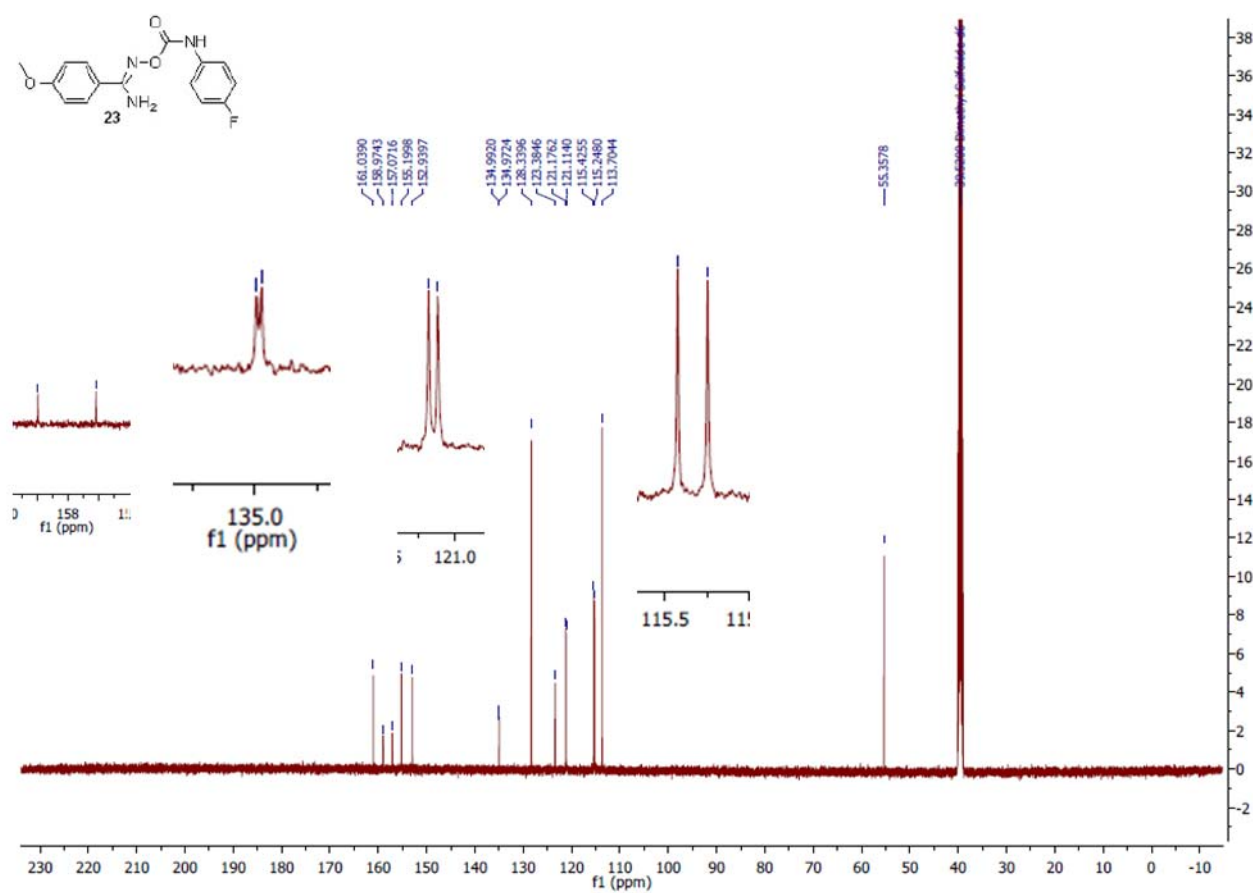

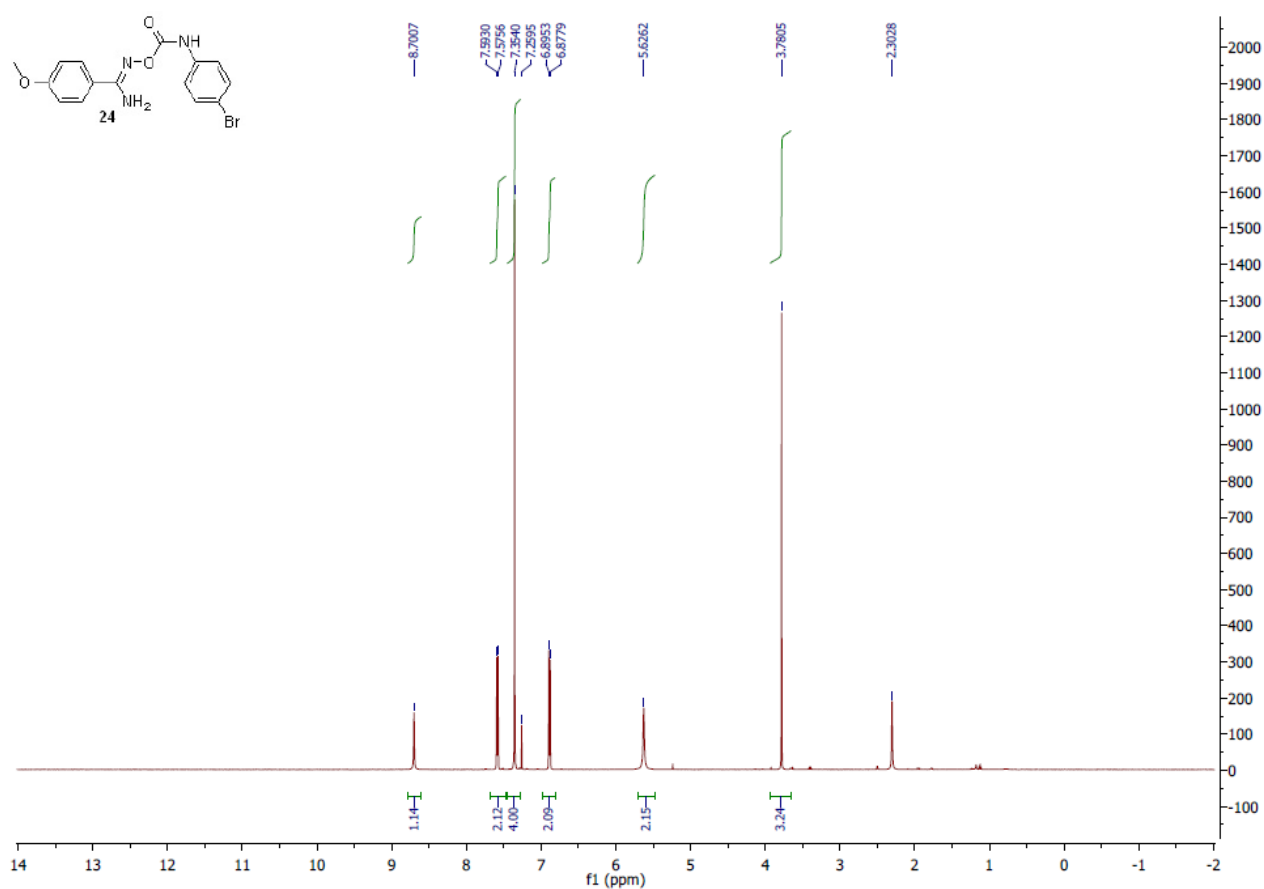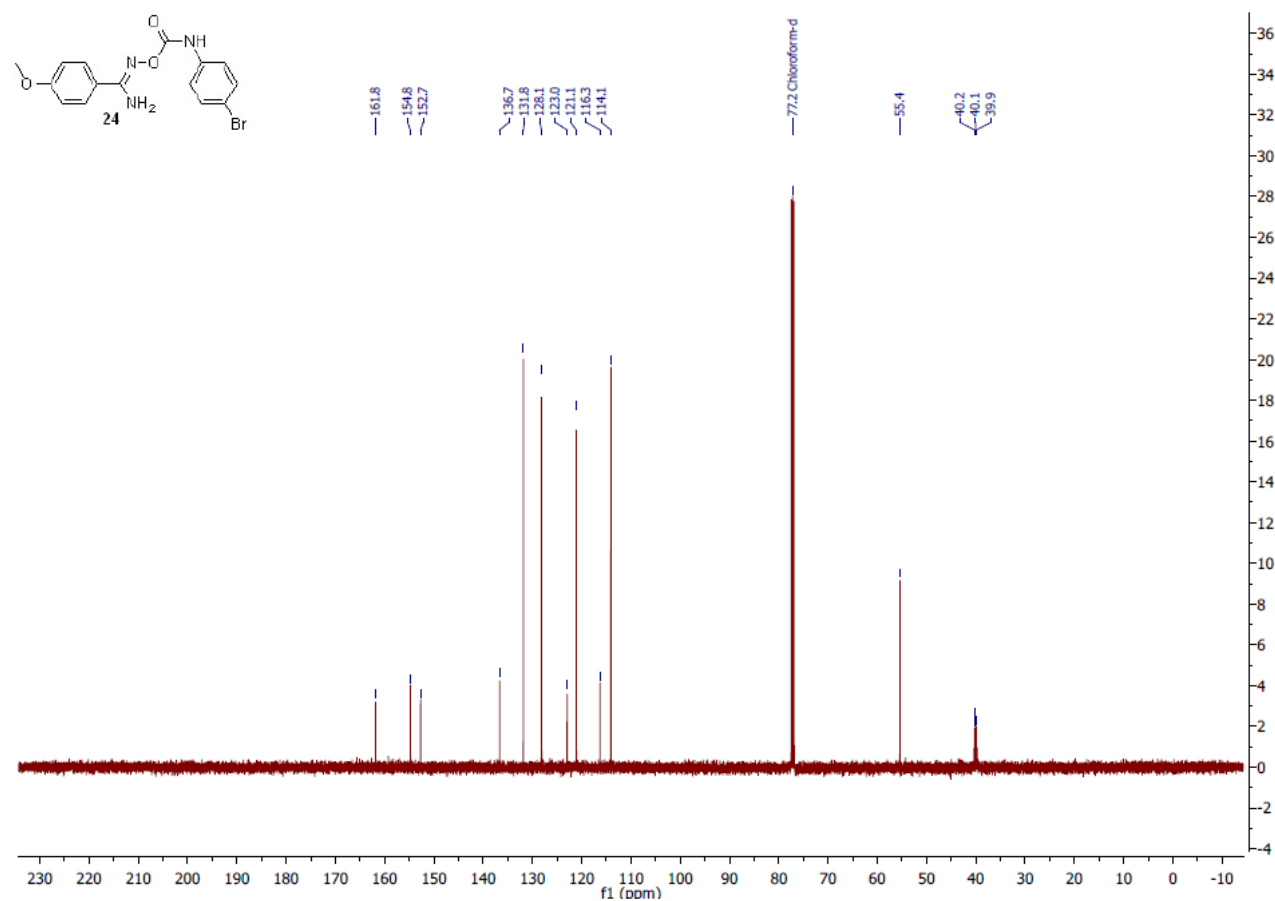

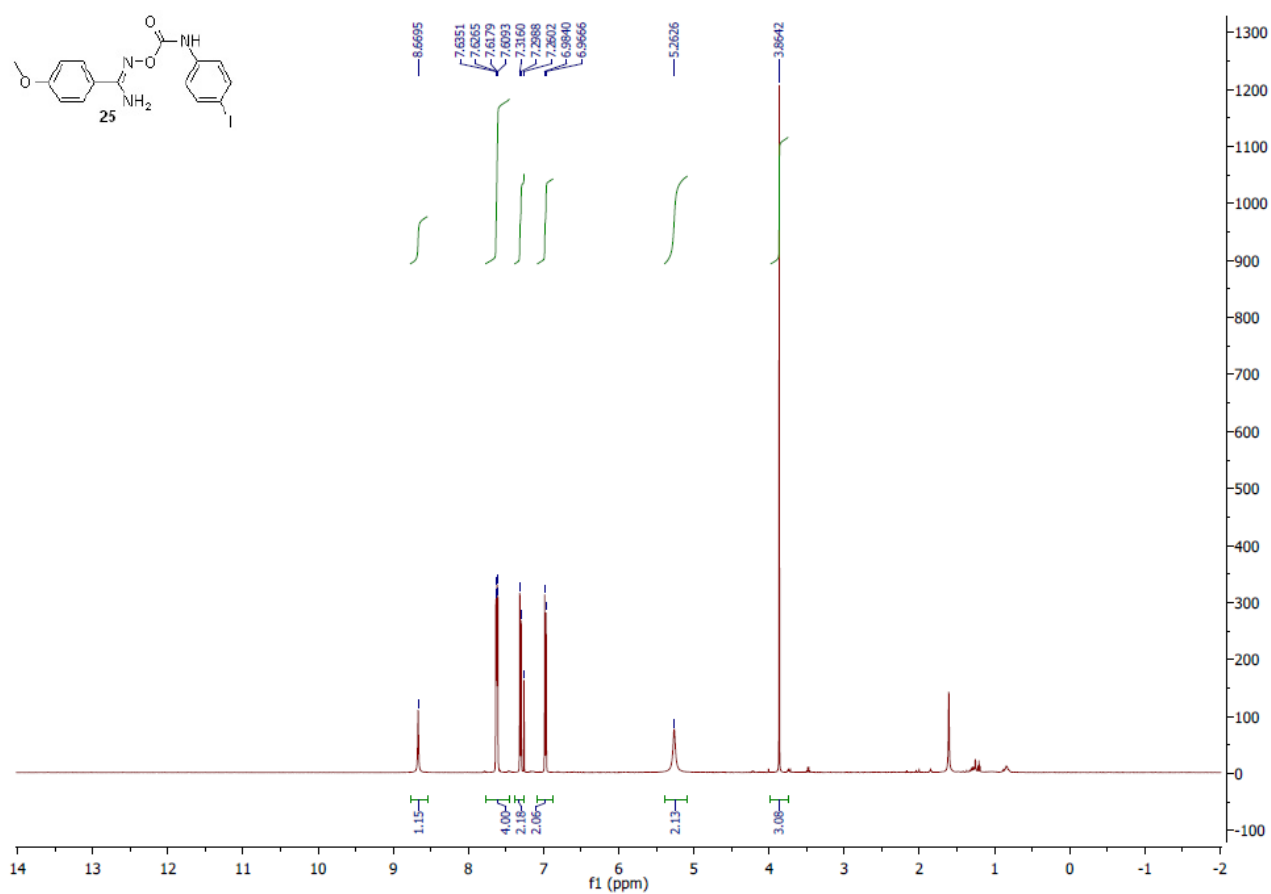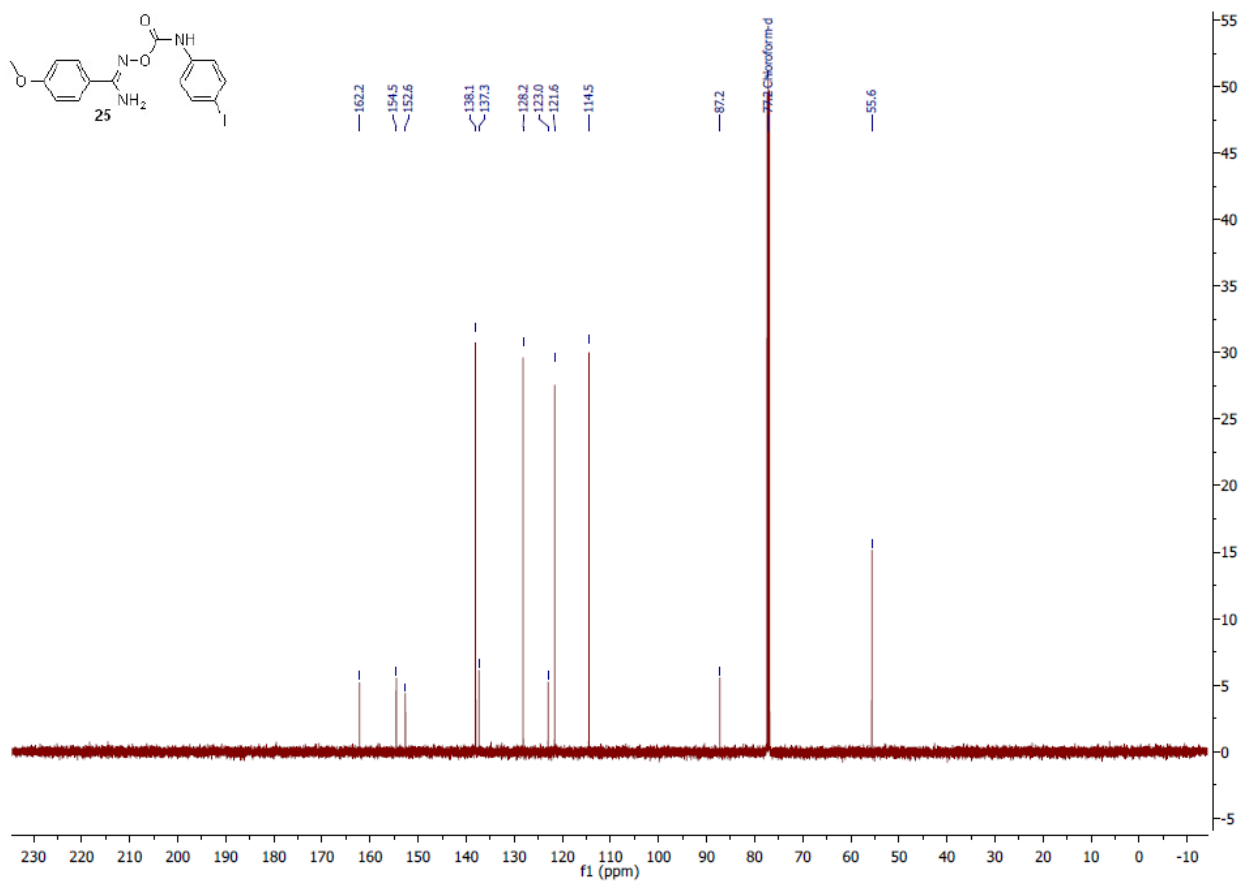

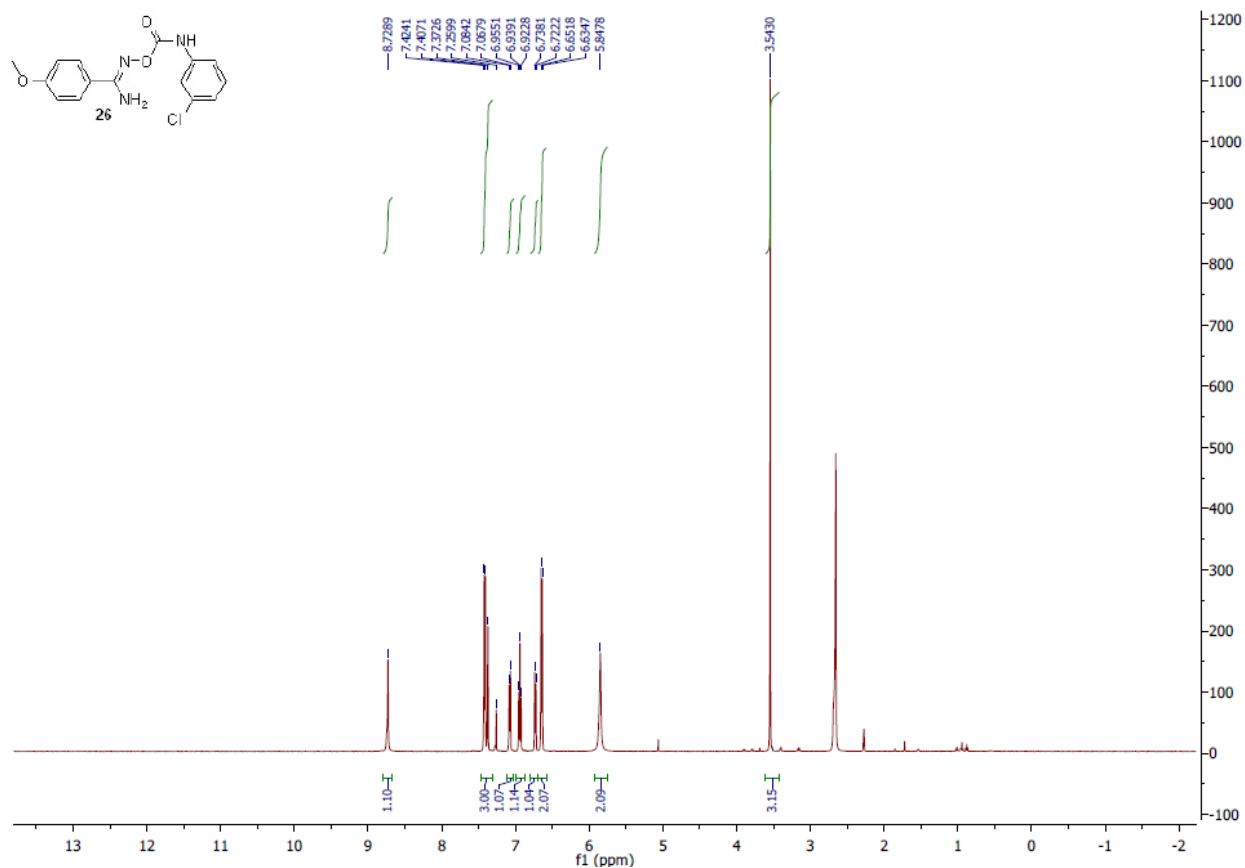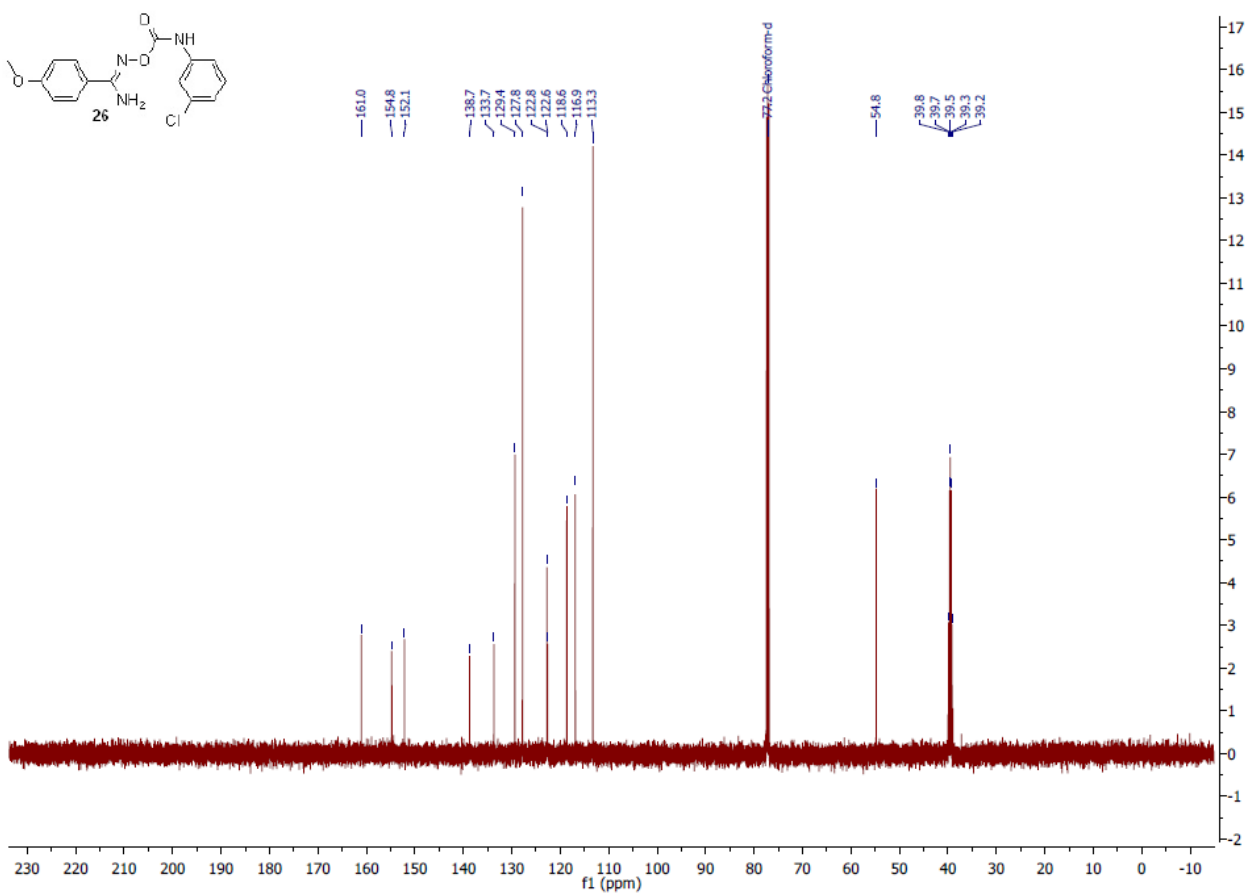

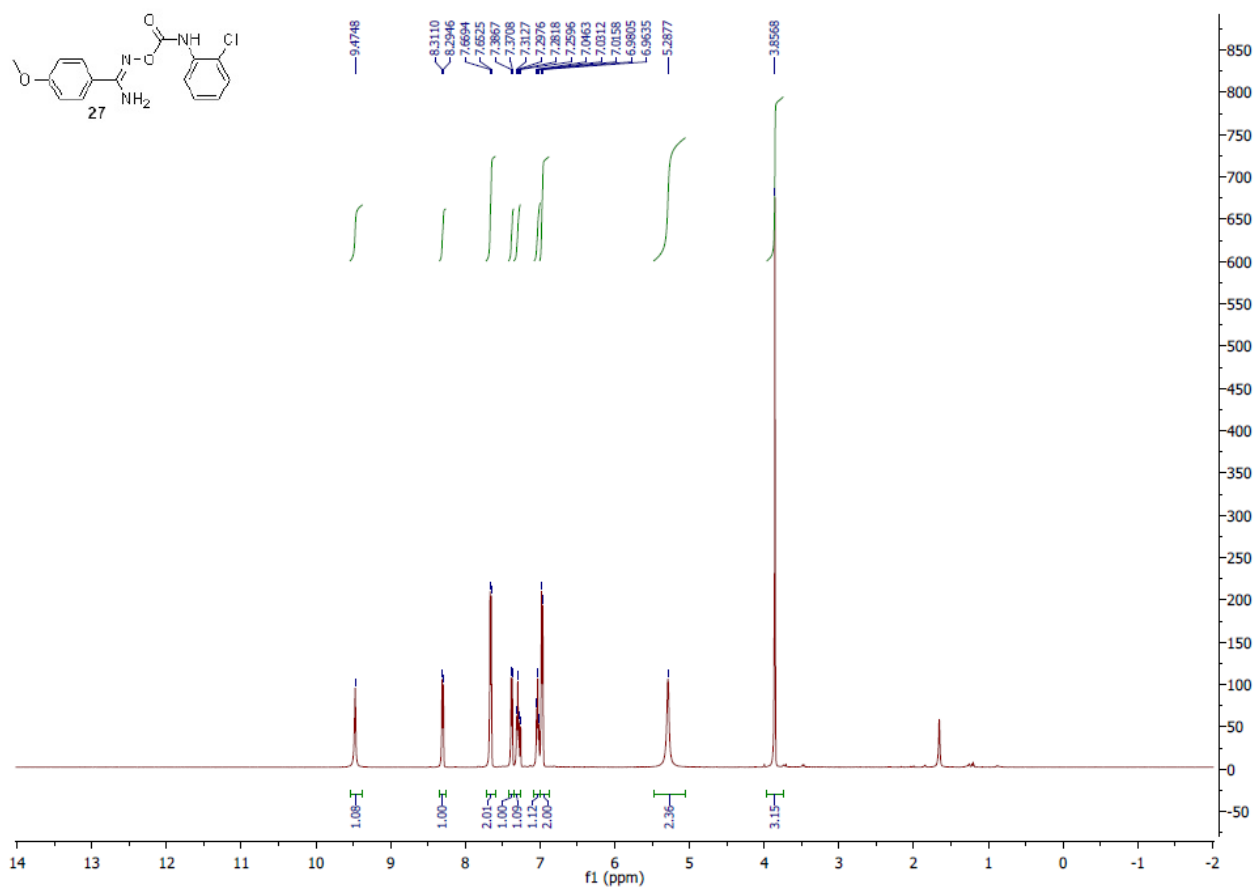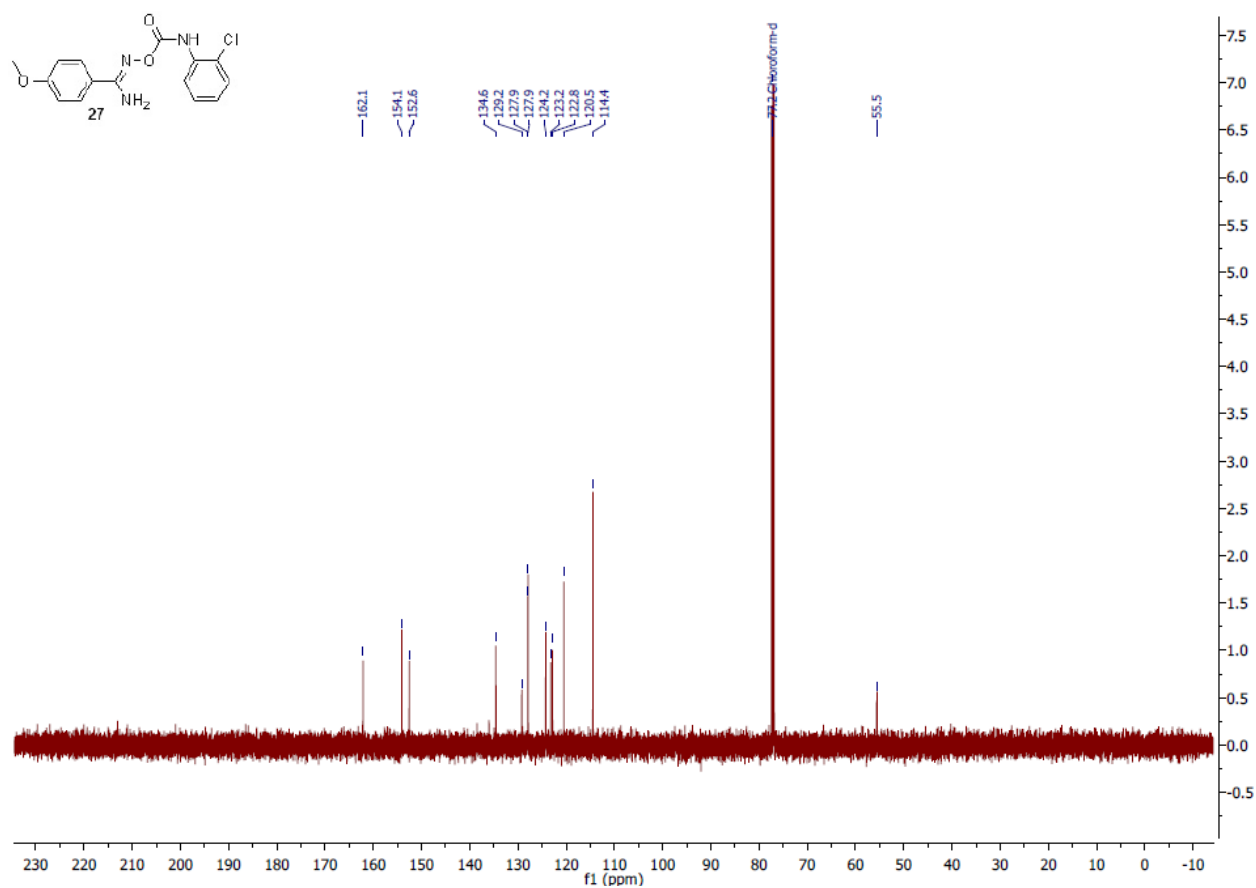

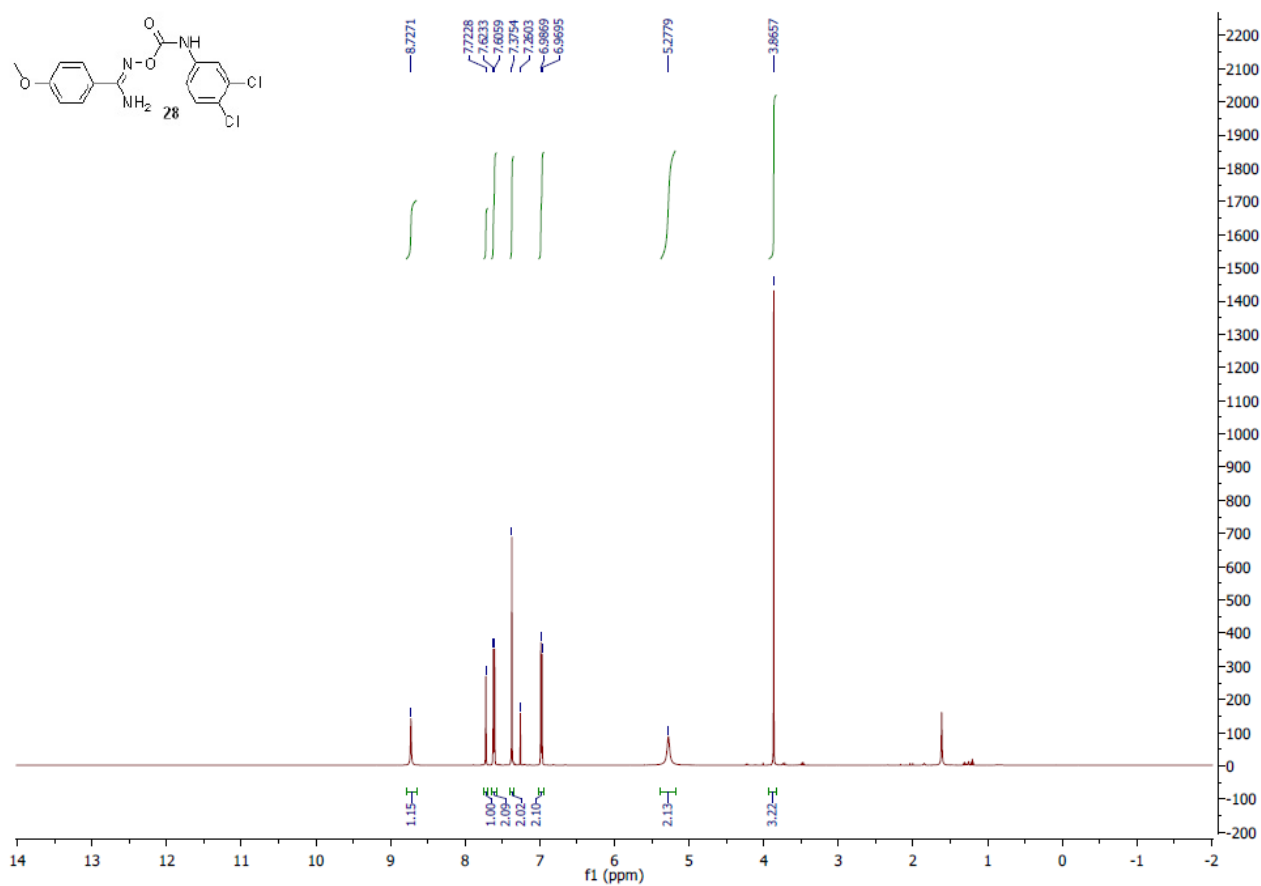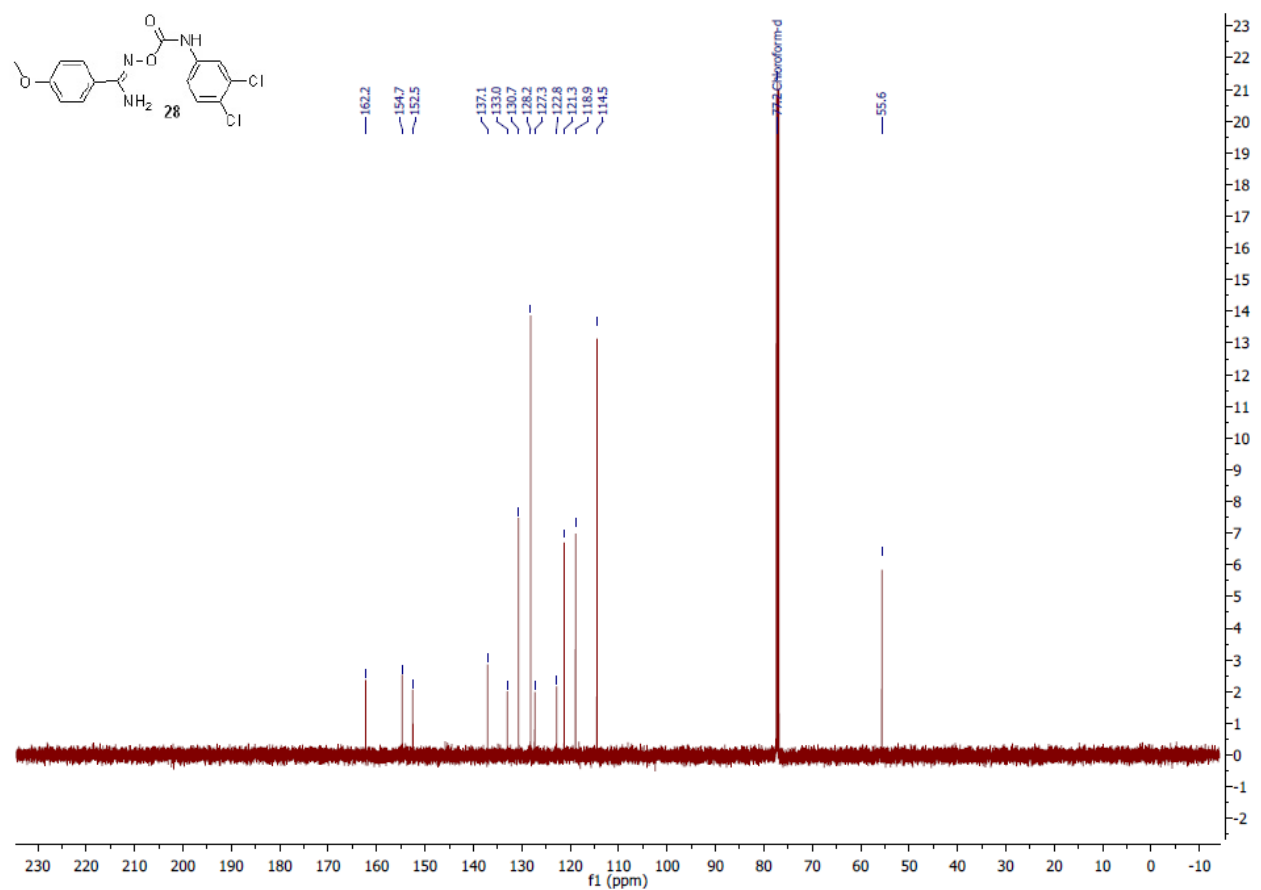

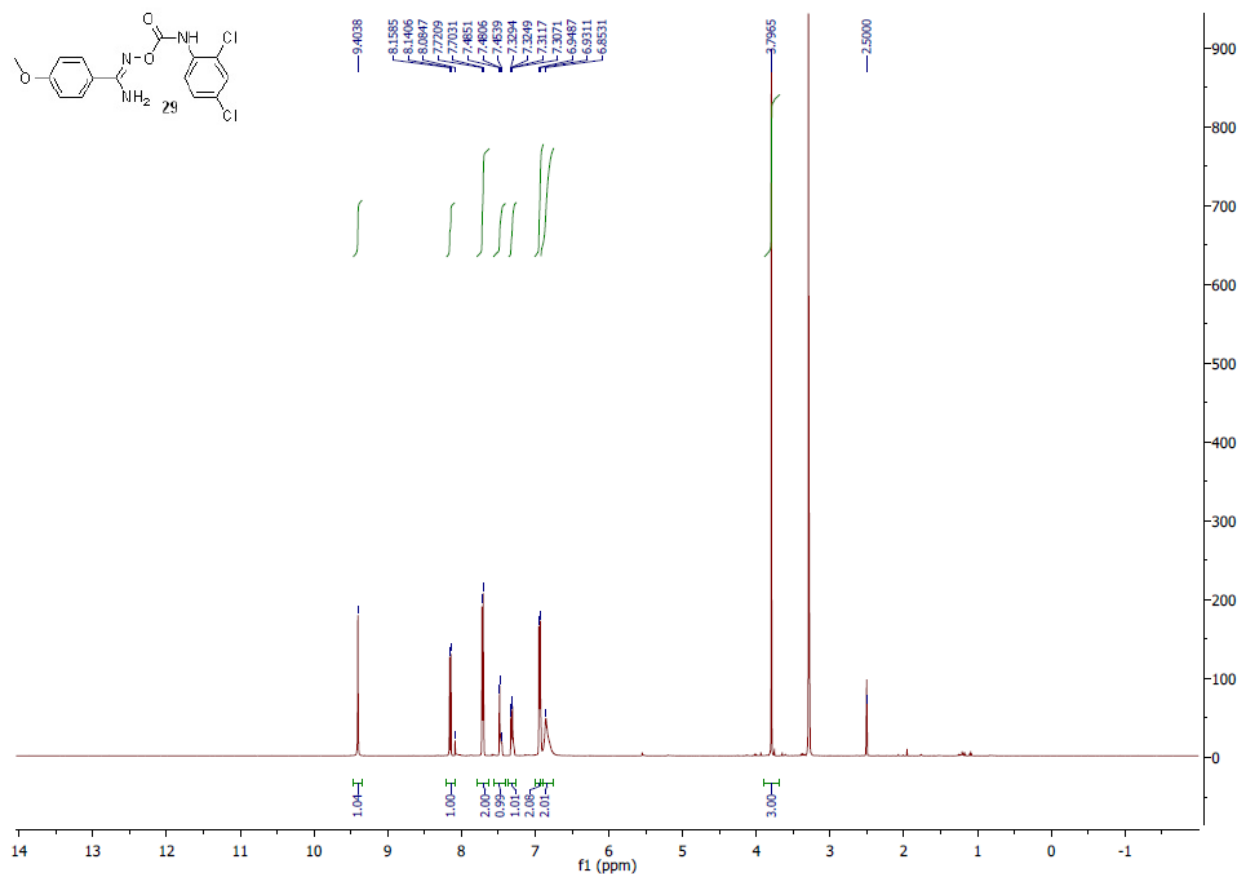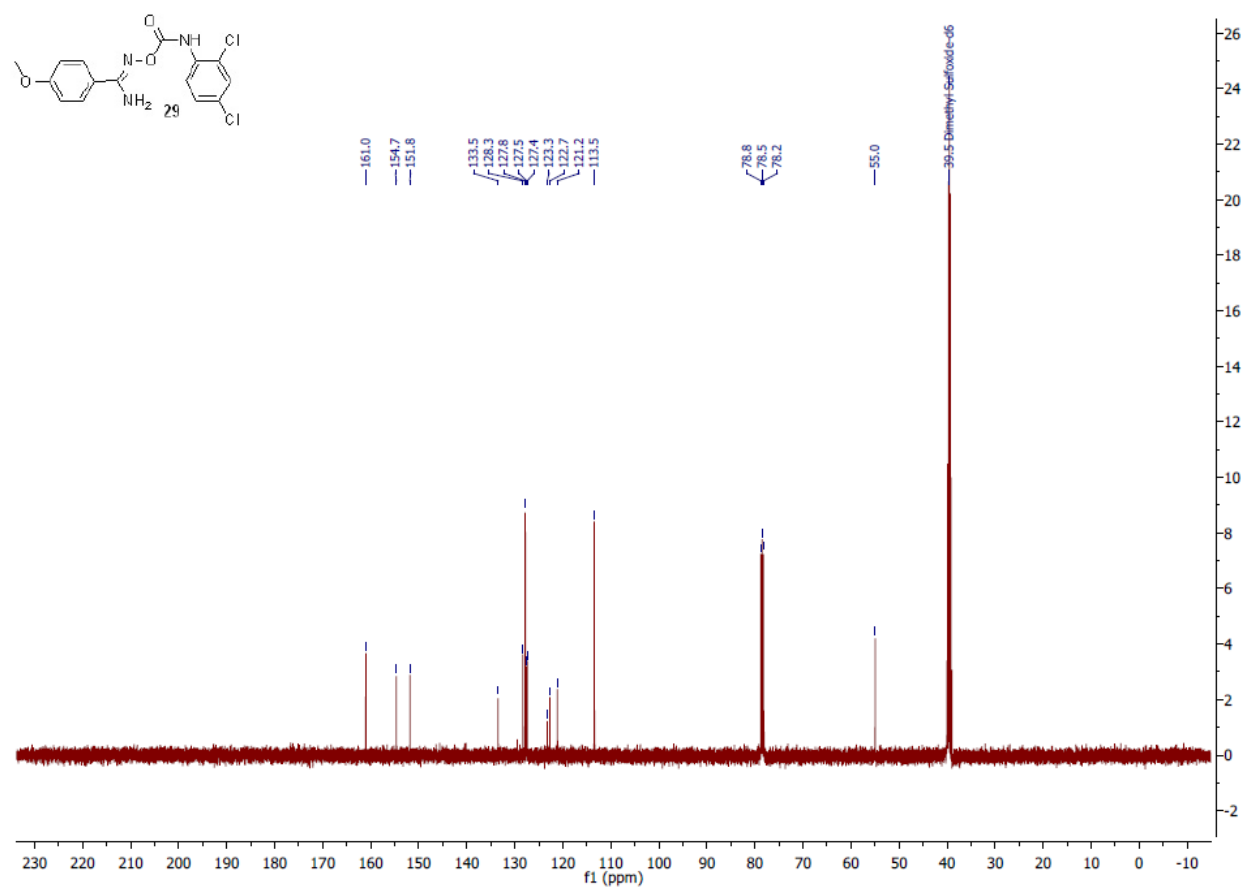



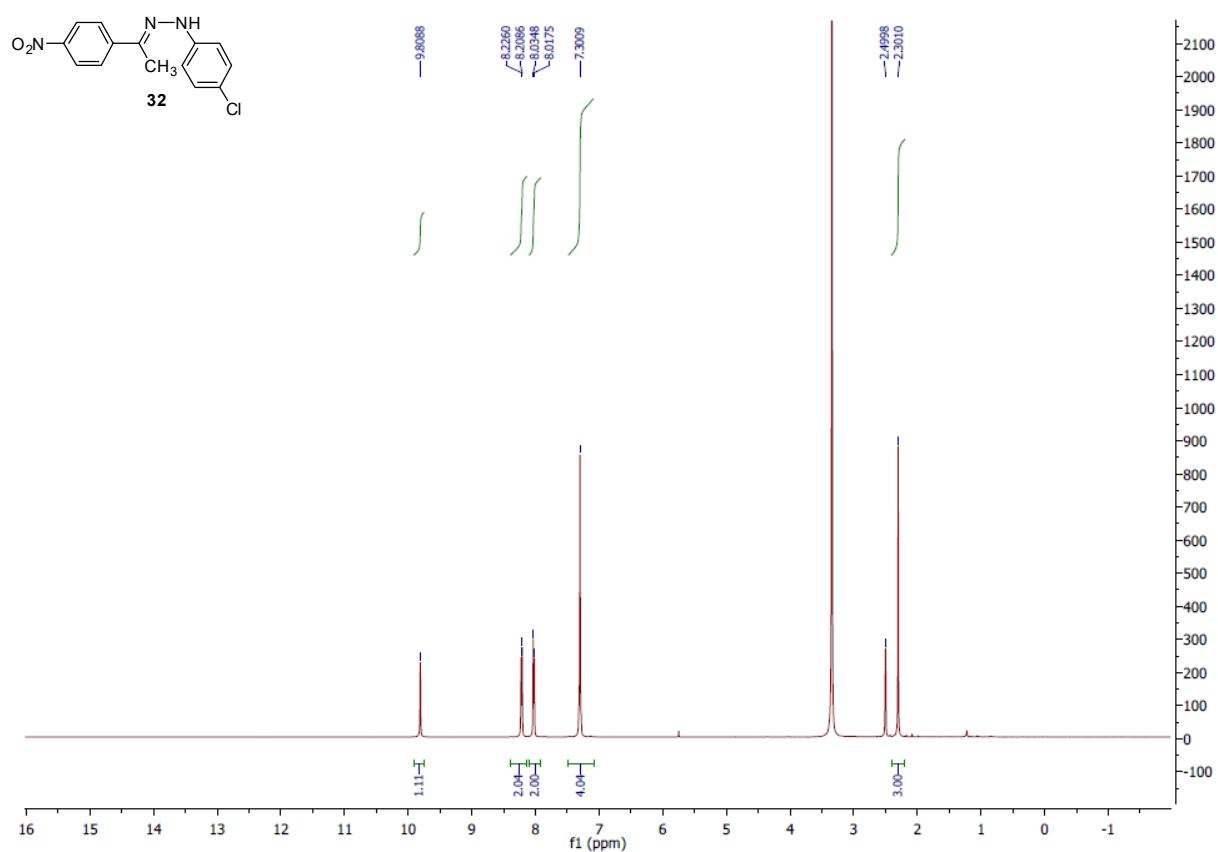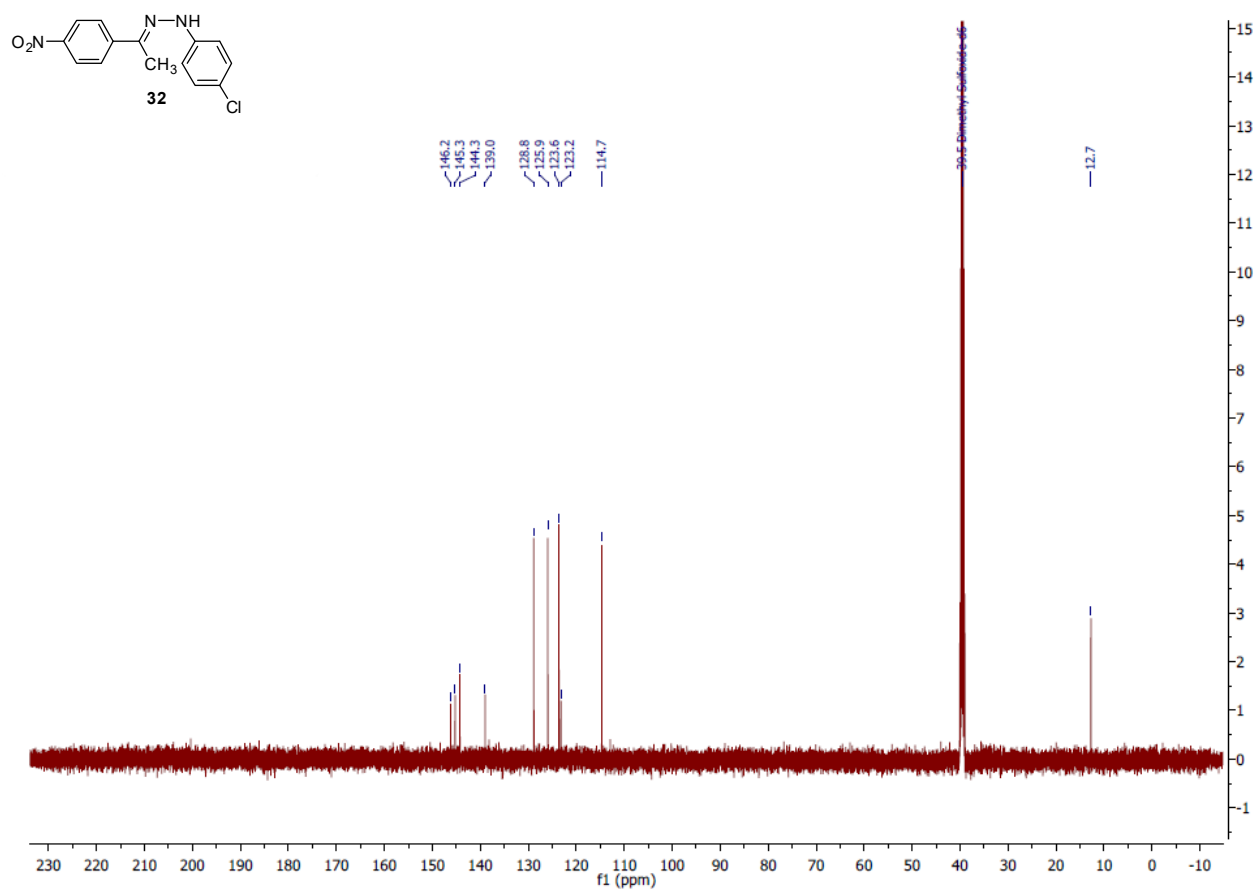

## S1B. Copies of HRMS measurements.

16

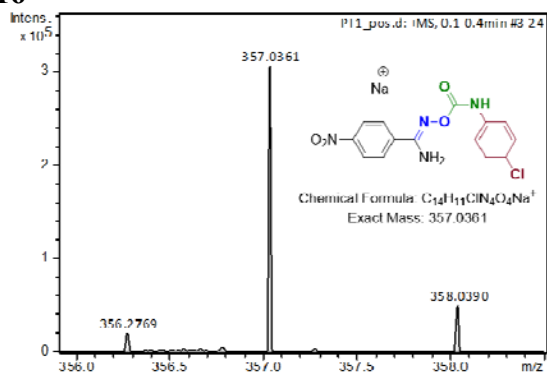

| Ion $m/z$ theoretical | Ion $m/z$ observed | mass error (ppm) |
|-----------------------|--------------------|------------------|
| $[M+Na]^+$ 357.0361   | 357.0361           | 0.00             |

17

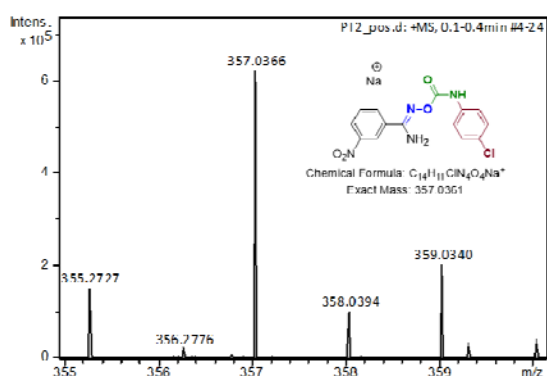

| Ion $m/z$ theoretical | ion $m/z$ observed | mass error (ppm) |
|-----------------------|--------------------|------------------|
| $[M+Na]^+$ 357.0361   | 357.0366           | 1.40             |

18

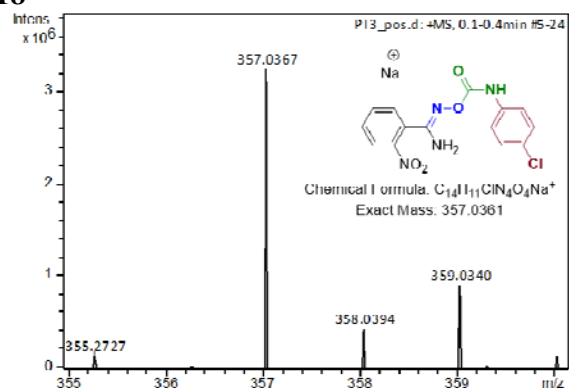

| Ion $m/z$ theoretical | ion $m/z$ observed | mass error (ppm) |
|-----------------------|--------------------|------------------|
| $[M+Na]^+$ 357.0361   | 357.0367           | 1.68             |

19

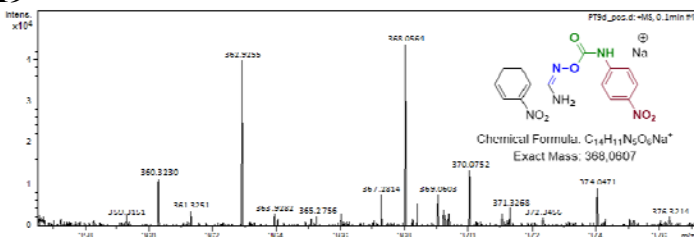

20

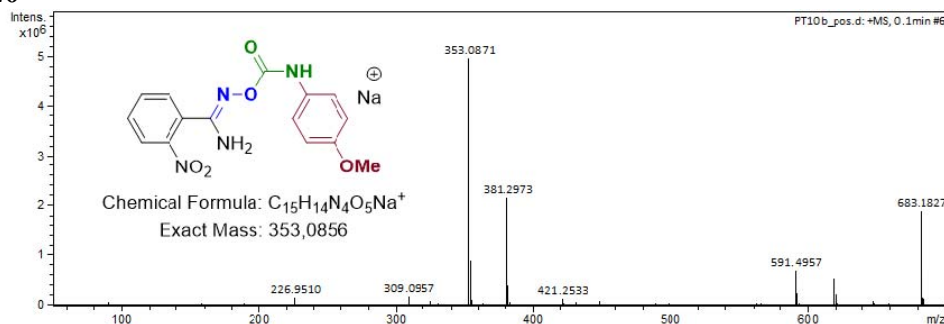

| Ion m/z theoretical | ion m/z observed | mass error (ppm) |
|---------------------|------------------|------------------|
| $[M+Na]^+$ 353.0856 | 353.0871         | 4.25             |

21

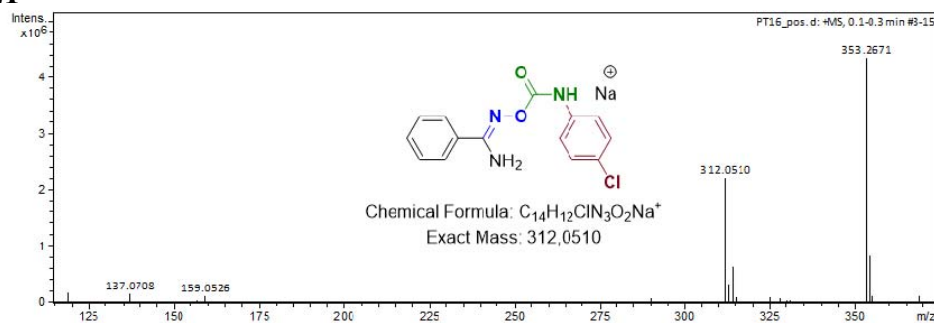

| Ion m/z theoretical | ion m/z observed | mass error (ppm) |
|---------------------|------------------|------------------|
| $[M+Na]^+$ 312.0510 | 312.0510         | 0.00             |

22

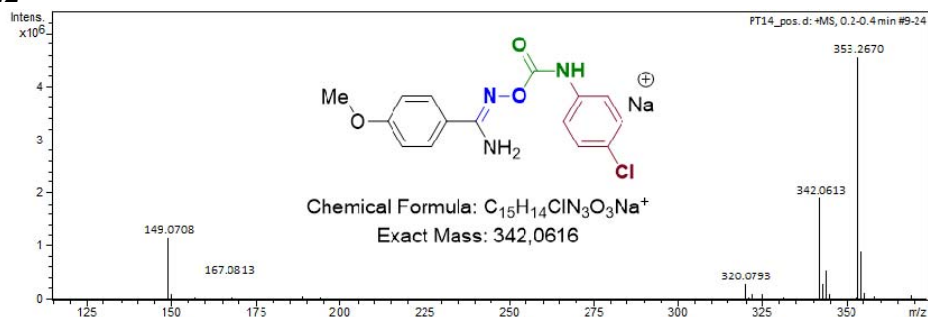

| Ion m/z theoretical | ion m/z observed | mass error (ppm) |
|---------------------|------------------|------------------|
| $[M+Na]^+$ 342.0616 | 342.0613         | 0.88             |

23

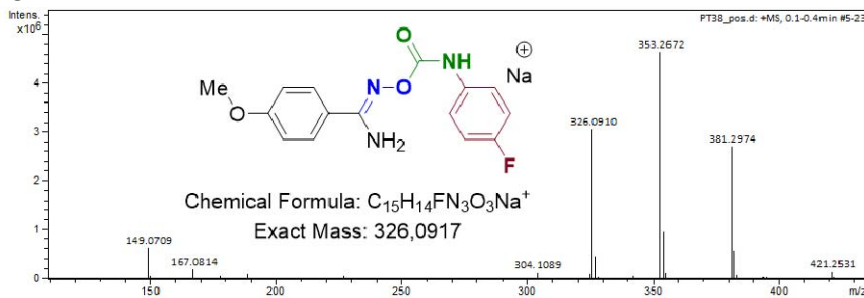

| Ion m/z theoretical | ion m/z observed | mass error (ppm) |
|---------------------|------------------|------------------|
| $[M+Na]^+$ 326.0917 | 326.0910         | 2.15             |
| $[M+H]^+$ 304.1092  | 304.1089         | 0.99             |

24

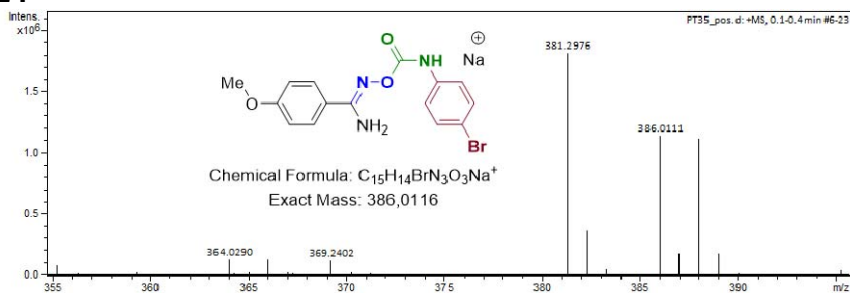

| Ion m/z theoretical | ion m/z observed | mass error (ppm) |
|---------------------|------------------|------------------|
| $[M+Na]^+$ 386.0116 | 386.0111         | 1.31             |
| $[M+H]^+$ 364.0291  | 364.0290         | 0.27             |

25

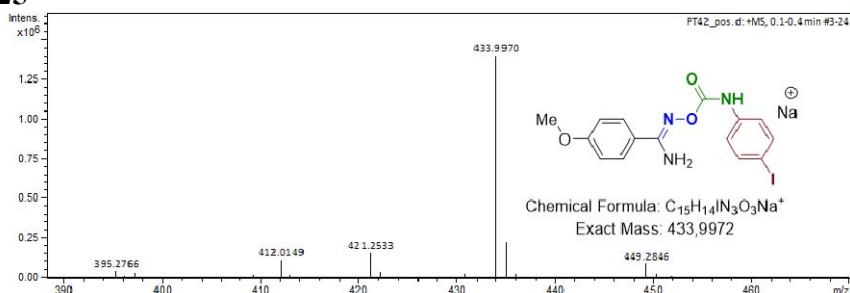

| Ion m/z theoretical | ion m/z observed | mass error (ppm) |
|---------------------|------------------|------------------|
| $[M+Na]^+$ 433.9972 | 433.9970         | 0.46             |
| $[M+H]^+$ 412.0152  | 412.0149         | 0.73             |

26

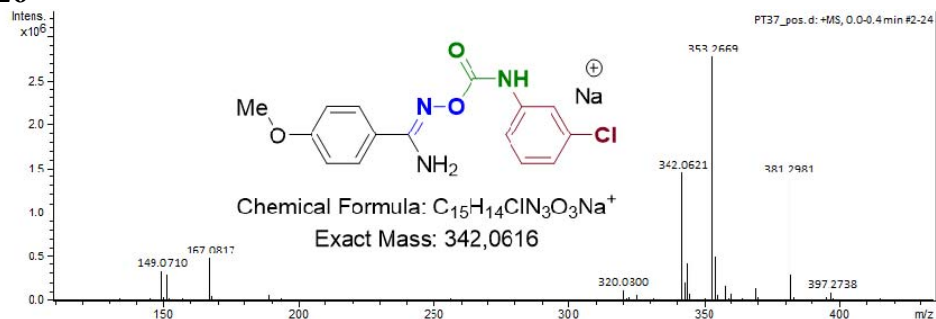

| Ion m/z theoretical | ion m/z observed | mass error (ppm) |
|---------------------|------------------|------------------|
| $[M+Na]^+$ 342.0616 | 342.0621         | 1.46             |
| $[M+H]^+$ 320.0796  | 320.0800         | 1.25             |

27

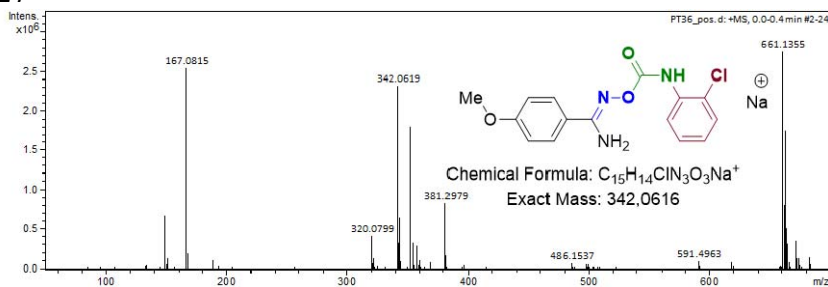

| Ion m/z theoretical | ion m/z observed | mass error (ppm) |
|---------------------|------------------|------------------|
| $[M+Na]^+$ 342.0616 | 342.0619         | 0.88             |
| $[M+H]^+$ 320.0796  | 320.0799         | 0.94             |

28

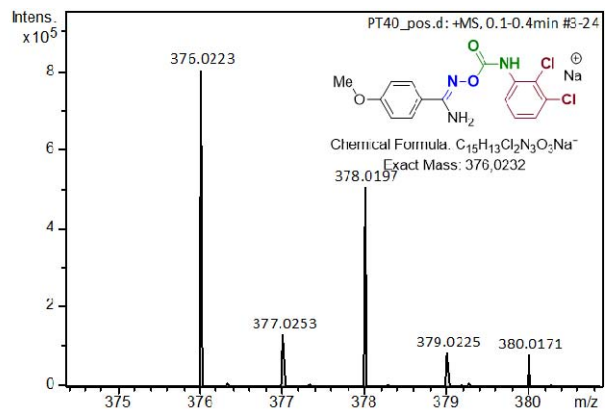

| Ion m/z theoretical          | ion m/z observed | mass error (ppm) |
|------------------------------|------------------|------------------|
| [M+Na] <sup>+</sup> 376.0226 | 376.0223         | 2.39             |

29

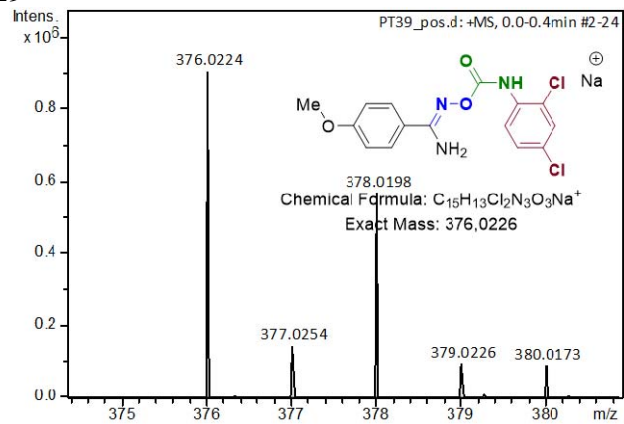

| Ion m/z theoretical          | ion m/z observed | mass error (ppm) |
|------------------------------|------------------|------------------|
| [M+Na] <sup>+</sup> 376.0226 | 376.0224         | 0.53             |

32

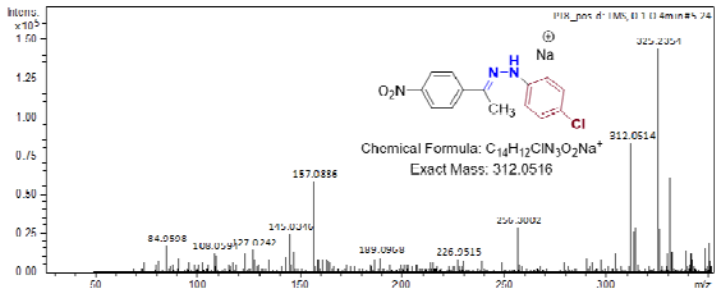

| Ion m/z theoretical          | ion m/z observed | mass error (ppm) |
|------------------------------|------------------|------------------|
| [M+Na] <sup>+</sup> 312.0516 | 312.0514         | 0.64             |

**S2A.** UV-vis spectra, in DMSO.

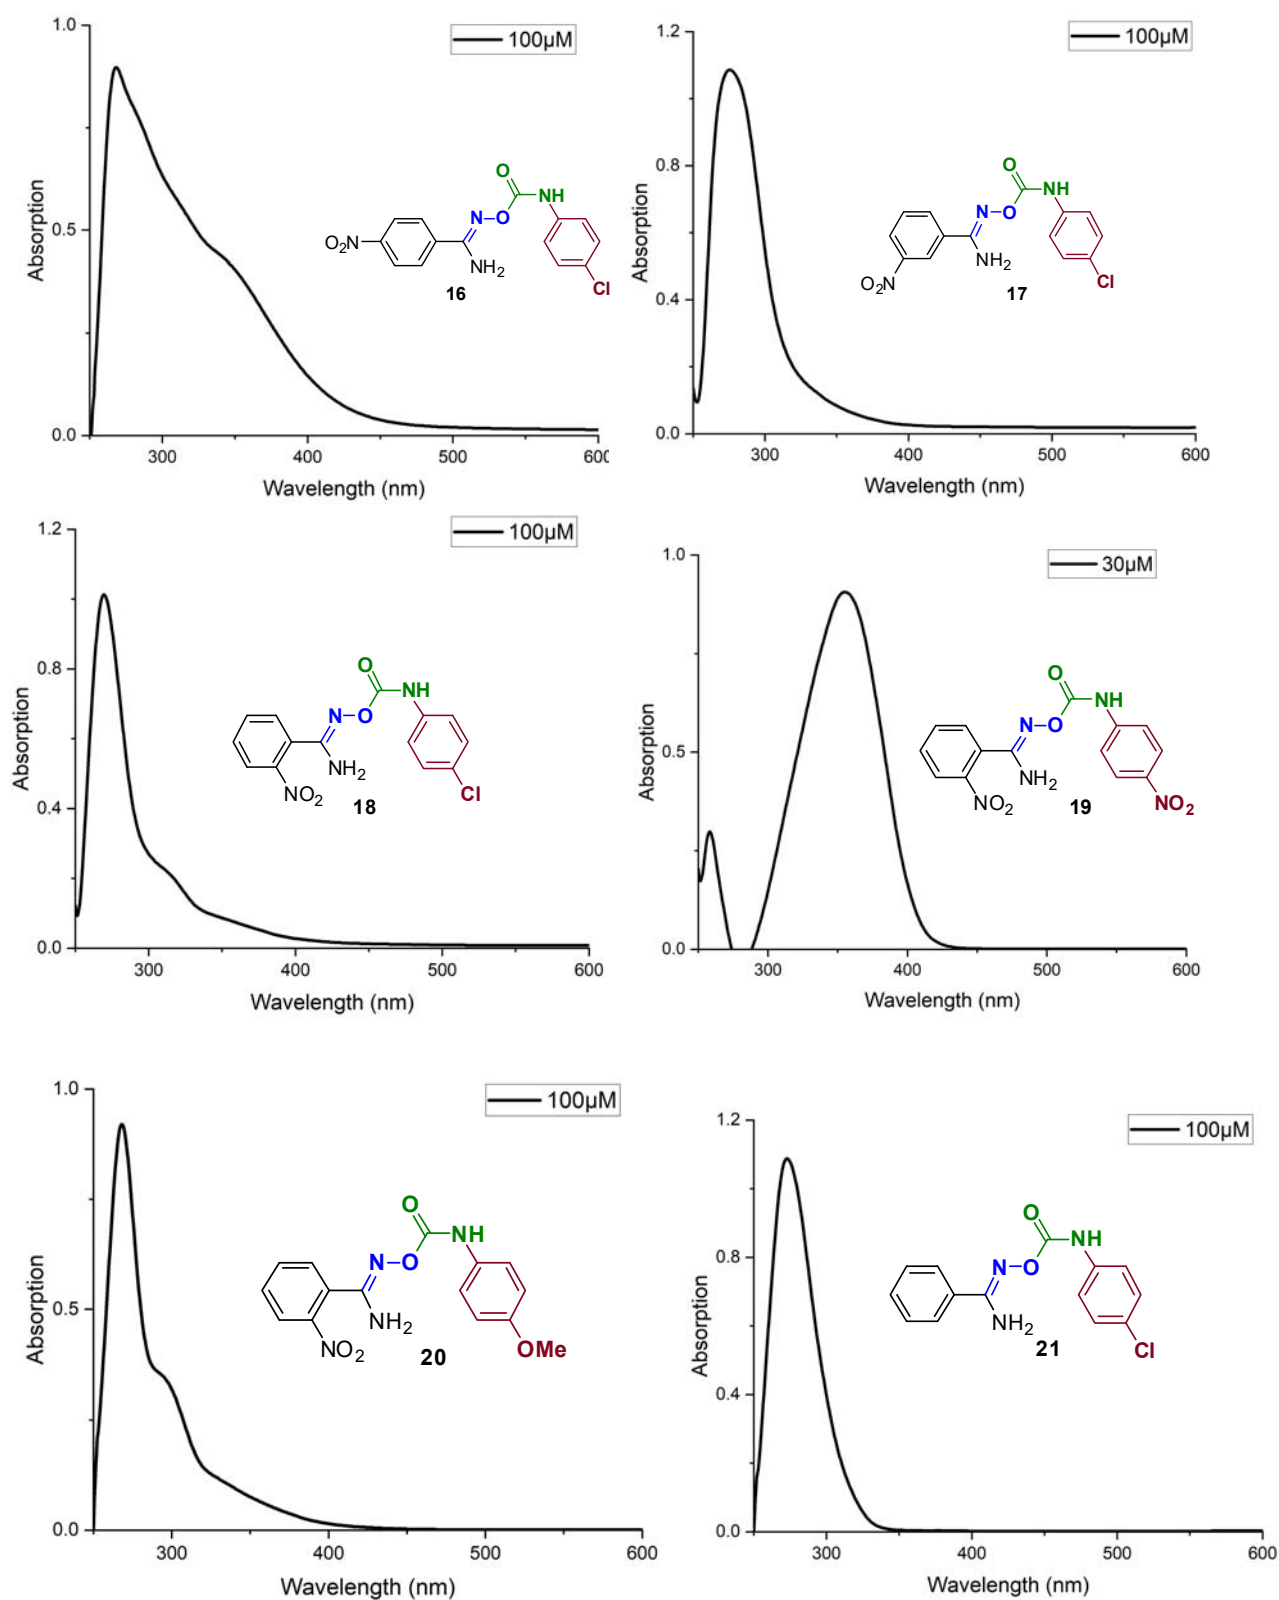

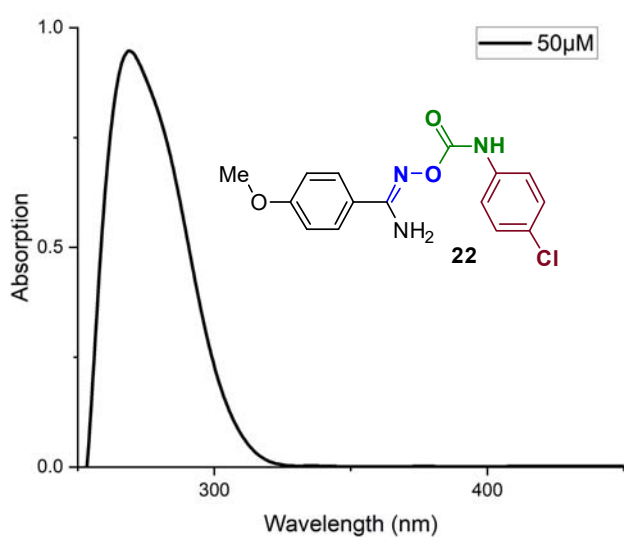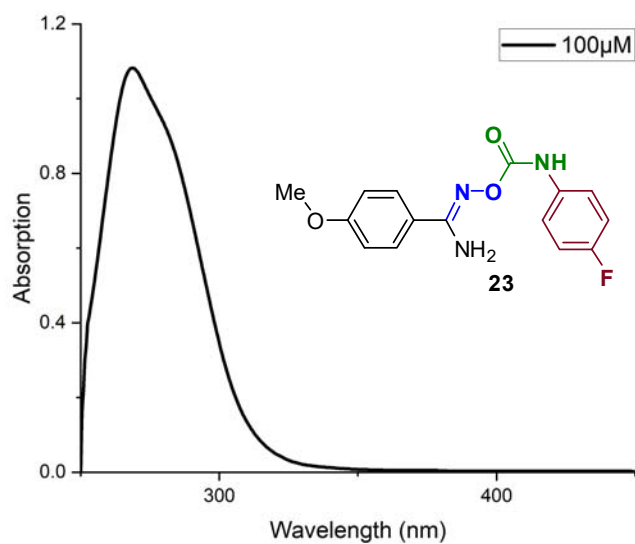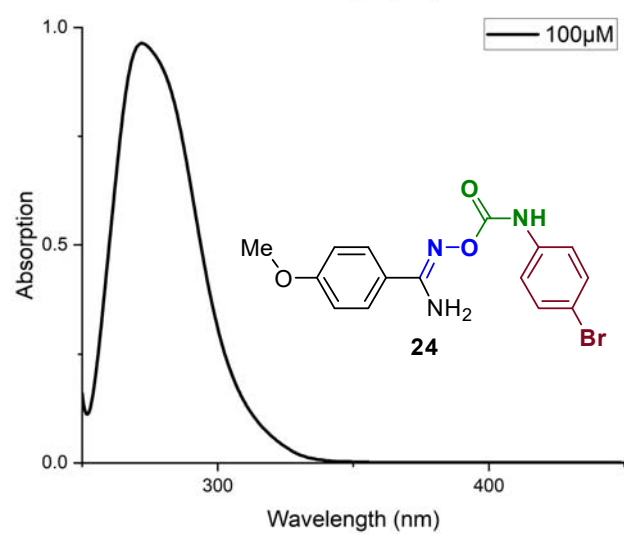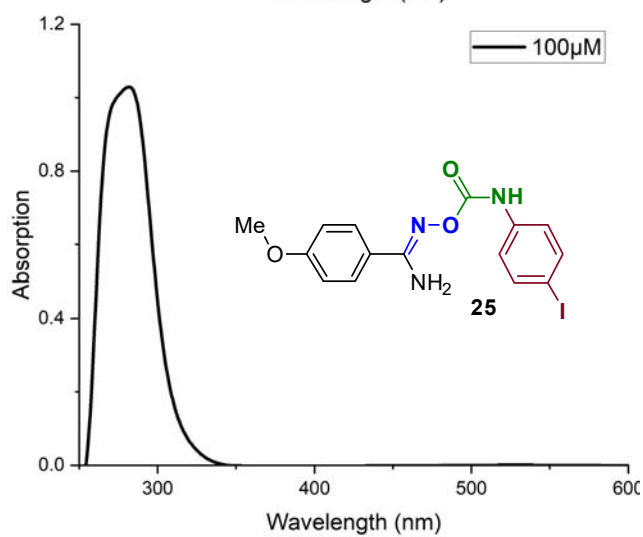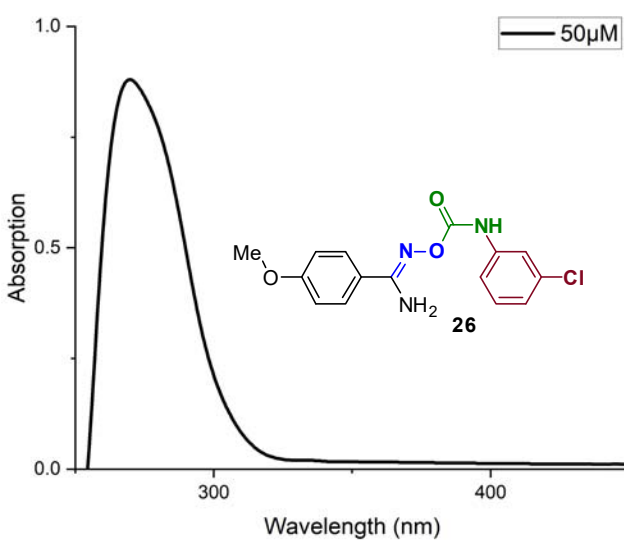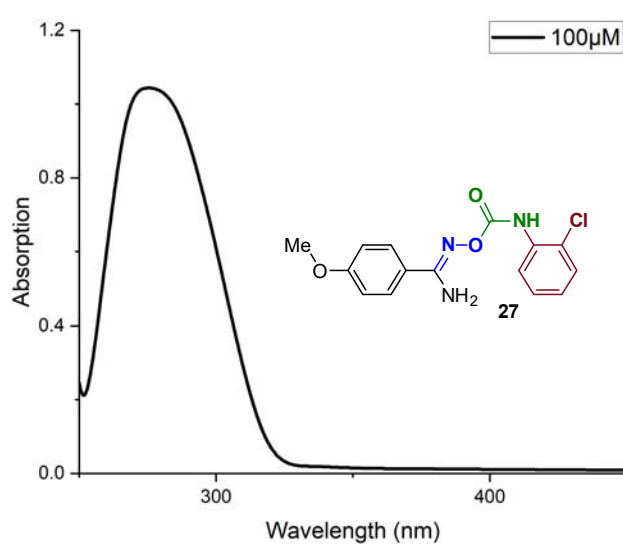

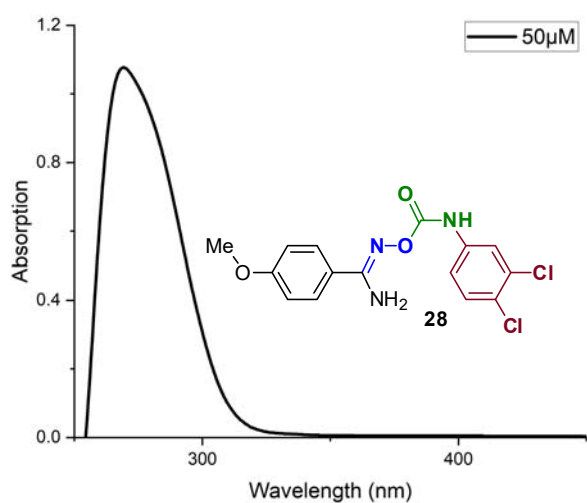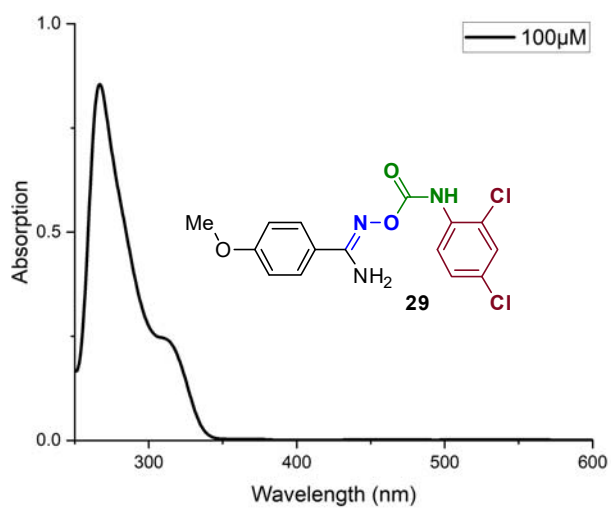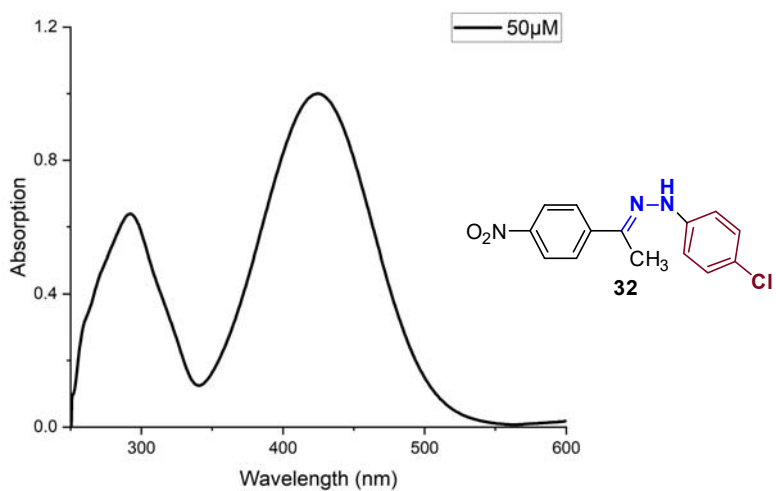



**S2B. Copies of UV-Vis spectra of compounds 17, 22, 26 and 28 upon increasing amounts of CT-DNA**

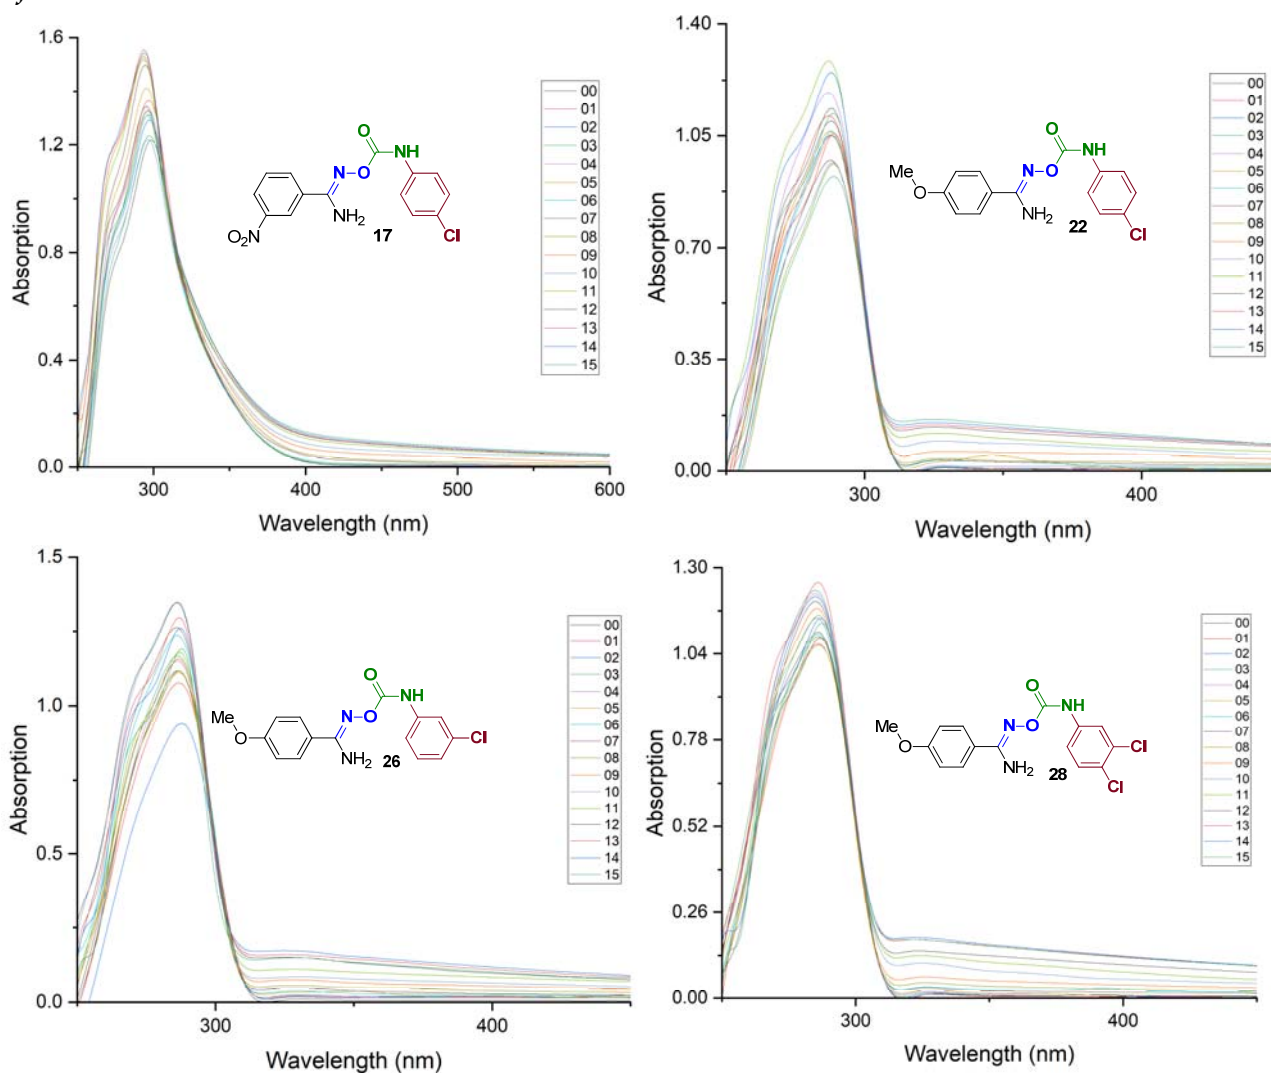

**Table.** UV-vis spectral features of the interaction of the compounds **17**, **22**, **26** and **28** (500 $\mu$ M) with CT DNA. UV-band ( $\lambda$  in nm) (percentage of the observed hyper-/hypochromism ( $\Delta A/A_0$ , in %), blue-/red-shift of the  $\lambda_{\max}$  ( $\Delta\lambda$ , in nm)) and DNA-binding constants ( $K_b$ , in  $M^{-1}$ ).

| Compound  | $\lambda$ (nm) ( $\Delta A/A_0$ (%), <sup>a</sup> $\Delta\lambda$ (nm) <sup>b</sup> ) | $K_b$ ( $M^{-1}$ )           |
|-----------|---------------------------------------------------------------------------------------|------------------------------|
| <b>17</b> | 298 (+25, <sup>a</sup> -5 <sup>b</sup> )                                              | $4.66(\pm 0.15) \times 10^6$ |
| <b>22</b> | 287 (+22, 0)                                                                          | $9.11(\pm 0.09) \times 10^5$ |
| <b>26</b> | 286 (+21, 0)                                                                          | $4.24(\pm 0.13) \times 10^5$ |
| <b>28</b> | 285 (-11, <sup>a</sup> +2 <sup>b</sup> )                                              | $7.24(\pm 0.08) \times 10^5$ |

<sup>a</sup> "+" denotes hyperchromism, "-" denotes hypochromism.

<sup>b</sup> "+" denotes red-shift, "-" denotes blue-shift.

### S3. Gel electrophoresis pictures and plots

#### S3A.

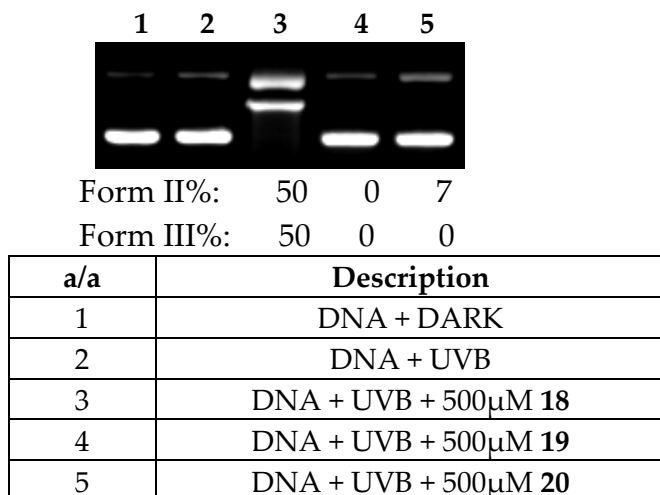

**Figure S3A.** Gel electrophoresis picture of the UVB irradiation of compounds **18-20** upon incubation with plasmid DNA.

#### S3B.

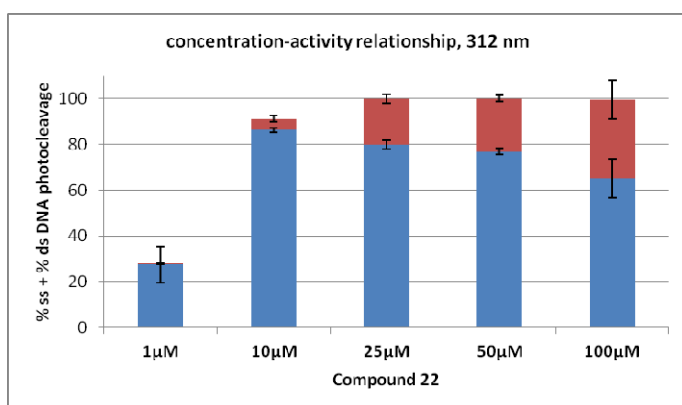

**Figure S3B.** Plots that depict all values derived from all experiments for compound **22** at various concentrations.

### S3C.

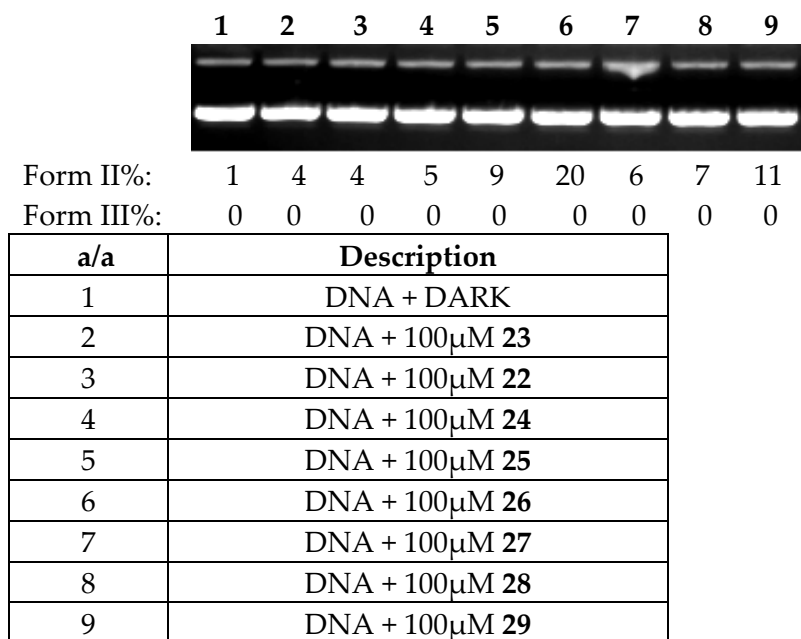

**Figure S3C.** Gel electrophoresis picture of compounds **22-29** upon incubation with plasmid DNA for 30 min in dark.

### S3D.

**Figure S3D.** Gel electrophoresis picture of compounds **16-29** and **32** under UVA irradiation. pBluescript SK II was used in this experiment.

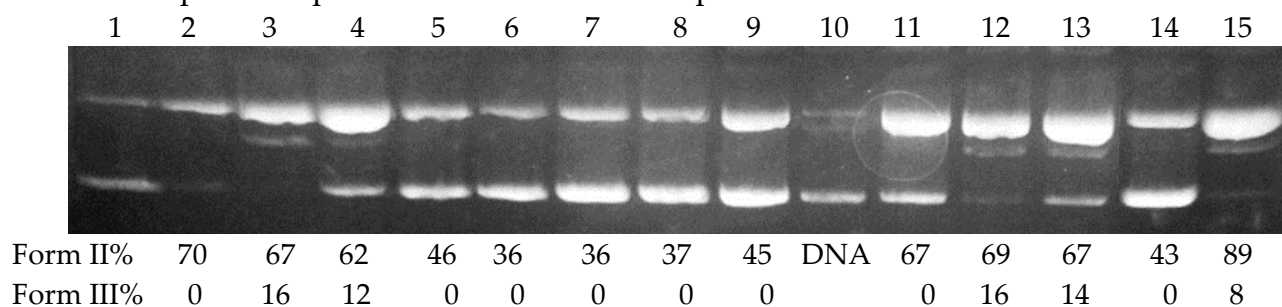

|   |                             |    |                             |
|---|-----------------------------|----|-----------------------------|
| 1 | DNA + UVA                   | 10 | DNA + UVA                   |
| 2 | DNA + UVA + 100μM <b>23</b> | 11 | DNA + UVA + 100μM <b>16</b> |
| 3 | DNA + UVA + 100μM <b>22</b> | 12 | DNA + UVA + 100μM <b>17</b> |
| 4 | DNA + UVA + 100μM <b>24</b> | 13 | DNA + UVA + 100μM <b>18</b> |
| 5 | DNA + UVA + 100μM <b>25</b> | 14 | DNA + UVA + 100μM <b>31</b> |
| 6 | DNA + UVA + 100μM <b>26</b> | 15 | DNA + UVA + 100μM <b>21</b> |
| 7 | DNA + UVA + 100μM <b>27</b> |    |                             |
| 8 | DNA + UVA + 100μM <b>28</b> |    |                             |
| 9 | DNA + UVA + 100μM <b>29</b> |    |                             |

## S.4. Uncropped gels

### 312 nm

1. 312nm, 15cm, 30min, tris pH=6.8, C= 500  $\mu$ M

Lines 1, 7-9 in Figure S.3.A.

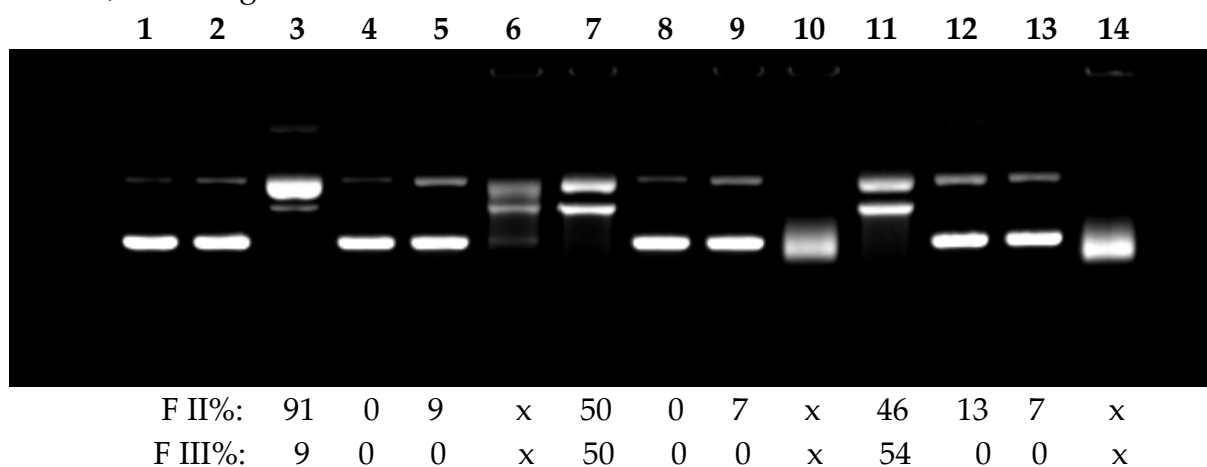

| a/a | description    | a/a | description    |
|-----|----------------|-----|----------------|
| 1   | DNA + DARK     | 8   | DNA + UVB + 19 |
| 2   | DNA + UVB      | 9   | DNA + UVB + 20 |
| 3   | DNA + UVB + 18 | 10  | Irrelevant (x) |
| 4   | DNA + UVB + 19 | 11  | DNA + UVB + 18 |
| 5   | DNA + UVB + 20 | 12  | DNA + UVB + 19 |
| 6   | Irrelevant (x) | 13  | DNA + UVB + 20 |
| 7   | DNA + UVB + 18 | 14  | Irrelevant (x) |

2. 312nm, 15cm, 30min, tris pH=6.8, C= 100  $\mu$ M

Lines 1,2,5,6,7,8 of present gel in Figure 2(a) for controls and compounds 22, 21, 18 and 16, respectively. The values of the rest are incorporated in the statistics of 22, 21, 18 and 16 in plots of Figure 2(b).

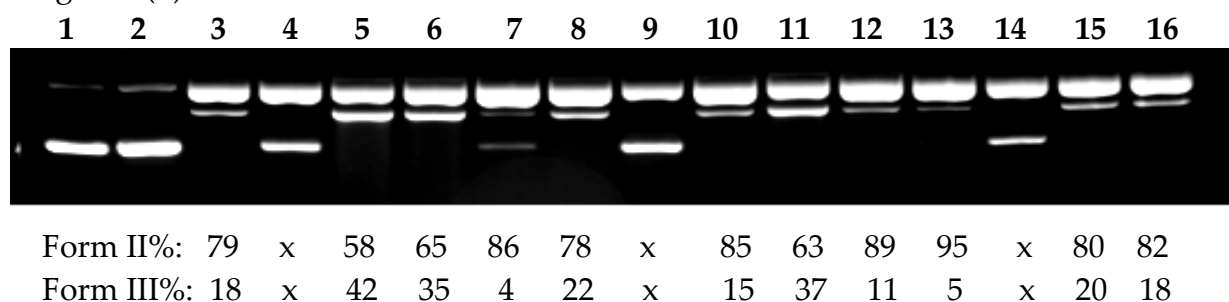

| a/a | description    | a/a | description    |
|-----|----------------|-----|----------------|
| 1   | DNA+ dark      | 9   | Irrelevant (x) |
| 2   | DNA+ UVB       | 10  | DNA + UVB + 22 |
| 3   | DNA + UVB + 16 | 11  | DNA + UVB + 21 |
| 4   | Irrelevant (x) | 12  | DNA + UVB + 18 |
| 5   | DNA + UVB + 22 | 13  | DNA + UVB + 16 |
| 6   | DNA + UVB + 21 | 14  | Irrelevant (x) |
| 7   | DNA + UVB + 18 | 15  | DNA + UVB + 22 |
| 8   | DNA + UVB + 16 | 16  | DNA + UVB + 21 |

### 3. 312nm, 15cm, 30min, tris pH=6.8

Lines 12,13,4,5,8,9 of present gel in Figure 2(a) for compounds **21**, **18** and **16**. The values of the rest are incorporated in the statistics of **21**, **18** and **16** in plots of Figure 2(b).

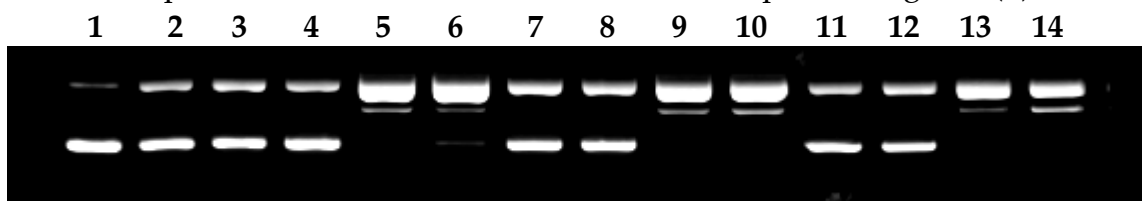

Form II%: 35 30 91 94 42 40 90 87 35 41 95 81  
Form III%: 0 0 9 4 0 0 10 13 0 0 5 19

| a/a | description                  | a/a | description                  |
|-----|------------------------------|-----|------------------------------|
| 1   | DNA + dark                   | 9   | DNA + UVB + <b>16</b> , 50μM |
| 2   | DNA + UVB                    | 10  | DNA + UVB + <b>16</b> , 50μM |
| 3   | DNA + UVB + <b>18</b> , 1μM  | 11  | DNA + UVB + <b>21</b> , 1μM  |
| 4   | DNA + UVB + <b>18</b> , 1μM  | 12  | DNA + UVB + <b>21</b> , 1μM  |
| 5   | DNA + UVB + <b>18</b> , 50μM | 13  | DNA + UVB + <b>21</b> , 50μM |
| 6   | DNA + UVB + <b>18</b> , 50μM | 14  | DNA + UVB + <b>21</b> , 50μM |
| 7   | DNA + UVB + <b>16</b> , 1μM  |     |                              |
| 8   | DNA + UVB + <b>16</b> , 1μM  |     |                              |

### 4. 312nm, 15cm, 30min, tris pH=6.8

Lines 4,9 of present gel in Figure 2(a) for compound **22**. The values of the rest are incorporated in the statistics of **22** in plots of Figure 2(b) and SI, S.3.B.

1 2 3 4 5 6 7 8 9 10 11 12 13 14

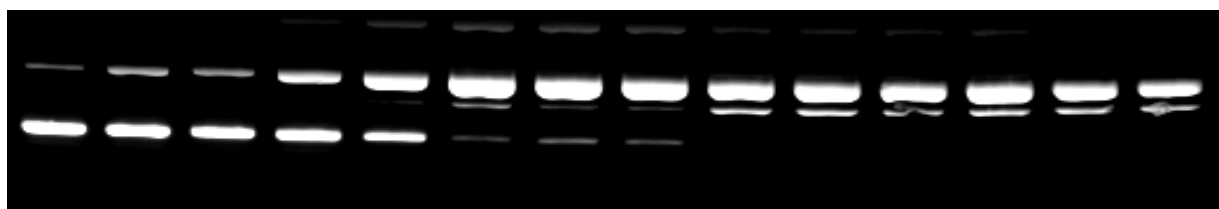

Form II%: 0 20 42 83 84 88 76 74 83 76 75 72  
Form III%: 0 0 1 10 3 3 24 26 17 24 25 28

| a/a | description                  | a/a | description                  |
|-----|------------------------------|-----|------------------------------|
| 1   | DNA+ dark                    | 9   | DNA + UVB + <b>22</b> , 25μM |
| 2   | DNA + UVB                    | 10  | DNA + UVB + <b>22</b> , 25μM |
| 3   | DNA + UVB + <b>22</b> , 1μM  | 11  | DNA + UVB + <b>22</b> , 25μM |
| 4   | DNA + UVB + <b>22</b> , 1μM  | 12  | DNA + UVB + <b>22</b> , 50μM |
| 5   | DNA + UVB + <b>22</b> , 1μM  | 13  | DNA + UVB + <b>22</b> , 50μM |
| 6   | DNA + UVB + <b>22</b> , 10μM | 14  | DNA + UVB + <b>22</b> , 50μM |
| 7   | DNA + UVB + <b>22</b> , 10μM |     |                              |
| 8   | DNA + UVB + <b>22</b> , 10μM |     |                              |

### 5. 312nm, 15cm, 30min, tris pH=6.8, 100 $\mu$ M

Lines 1-9 of present gel in Figure 3(a) for compounds **22-29**.

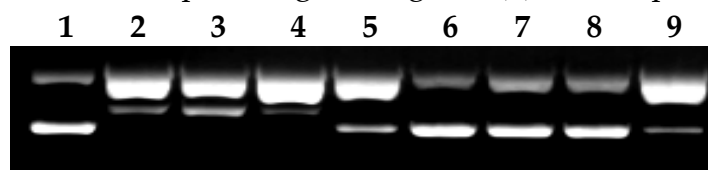

F II%: 87 74 95 74 3 18 15 87  
F III%: 13 26 5 0 0 0 0 0

| a/a | description           |
|-----|-----------------------|
| 1   | DNA+ UVB              |
| 2   | DNA + UVB + <b>23</b> |
| 3   | DNA + UVB + <b>22</b> |
| 4   | DNA + UVB + <b>24</b> |
| 5   | DNA + UVB + <b>25</b> |
| 6   | DNA + UVB + <b>26</b> |
| 7   | DNA + UVB + <b>27</b> |
| 8   | DNA + UVB + <b>28</b> |
| 9   | DNA + UVB + <b>29</b> |

### 6. 312nm, 15cm, 30min, tris pH=6.8, 100 $\mu$ M

The values of the present and the former gels are incorporated in the statistics of **22-29** in plots of Figure 3(b).

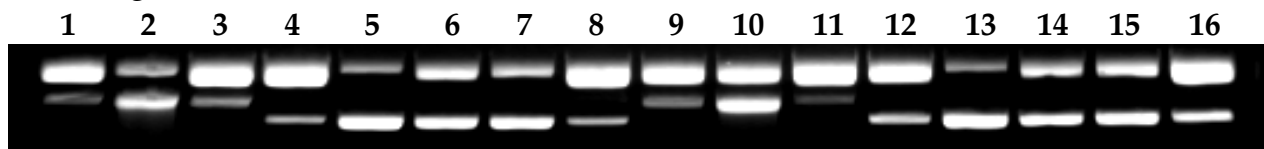

FI %: 82 19 79 73 1 30 20 72 76 42 90 58 0 26 27 54  
FIII%: 18 81 21 0 0 0 0 0 24 58 10 0 0 0 0 0

| a/a | description           | a/a | description           |
|-----|-----------------------|-----|-----------------------|
| 1   | DNA + UVB + <b>23</b> | 9   | DNA + UVB + <b>23</b> |
| 2   | DNA + UVB + <b>22</b> | 10  | DNA + UVB + <b>22</b> |
| 3   | DNA + UVB + <b>24</b> | 11  | DNA + UVB + <b>24</b> |
| 4   | DNA + UVB + <b>25</b> | 12  | DNA + UVB + <b>25</b> |
| 5   | DNA + UVB + <b>26</b> | 13  | DNA + UVB + <b>26</b> |
| 6   | DNA + UVB + <b>27</b> | 14  | DNA + UVB + <b>27</b> |
| 7   | DNA + UVB + <b>28</b> | 15  | DNA + UVB + <b>28</b> |
| 8   | DNA + UVB + <b>29</b> | 16  | DNA + UVB + <b>29</b> |

**7. 312nm, 15cm, 30min, tris pH=6.8, 100  $\mu$ M, mechanistic study of the DNA photocleavage of compound 22**

The values of the present gel lanes 1-8 are incorporated in Figure 4(b). The rest is the second run of the experiment.

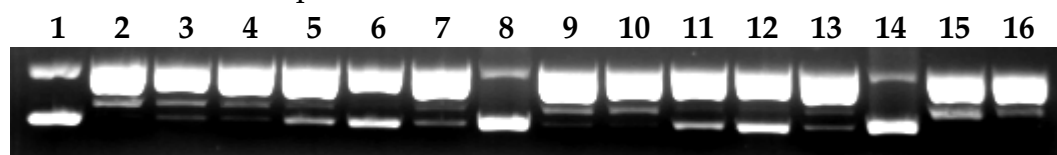

FII%: 80 76 86 73 52 80 0 83 84 70 46 87 0 72 87  
FIII%: 20 17 11 6 0 7 0 14 14 5 6 6 0 28 13

| a/a | description                                    | a/a | description                                    |
|-----|------------------------------------------------|-----|------------------------------------------------|
| 1   | DNA + UVB                                      | 9   | DNA + UVB + <b>22</b>                          |
| 2   | DNA + UVB + <b>22</b>                          | 10  | DNA + UVB + <b>22</b> + 1500 $\mu$ M cyst      |
| 3   | DNA + UVB + <b>22</b> + argon                  | 11  | DNA + UVB + <b>22</b> + 250 $\mu$ M KI         |
| 4   | DNA + UVB + <b>22</b> + 1500 $\mu$ M cyst      | 12  | DNA + UVB + <b>22</b> + 20 mM NaN <sub>3</sub> |
| 5   | DNA + UVB + <b>22</b> + 250 $\mu$ M KI         | 13  | DNA + UVB + <b>22</b> + D <sub>2</sub> O       |
| 6   | DNA + UVB + <b>22</b> + 20 mM NaN <sub>3</sub> | 14  | DNA + UVB + <b>22</b> + 20% DMSO               |
| 7   | DNA + UVB + <b>22</b> + D <sub>2</sub> O       | 15  | DNA + UVB + <b>22</b> + 750 $\mu$ M Mannitol   |
| 8   | DNA + UVB + <b>22</b> + 20% DMSO               | 16  | DNA + UVB + <b>22</b> + 250 $\mu$ M hist       |

**8. 312nm, 15cm, 30min, tris pH=6.8, 100  $\mu$ M, mechanistic study of the DNA photocleavage of compound 21**

The values of the present gel, lanes 1-8 are incorporated in Figure 4(a). The rest is the second run of the experiment.

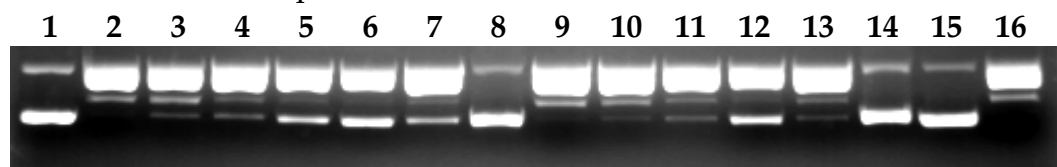

FII%: 83 71 75 56 45 61 0 77 70 63 52 74 1 0 78  
FIII%: 17 21 12 10 8 10 0 23 20 19 7 14 0 0 22

| a/a | description                                    | a/a | description                                    |
|-----|------------------------------------------------|-----|------------------------------------------------|
| 1   | DNA + UVB                                      | 9   | DNA + UVB + <b>21</b>                          |
| 2   | DNA + UVB + <b>21</b>                          | 10  | DNA + UVB + <b>21</b> + 1500 $\mu$ M cyst      |
| 3   | DNA + UVB + <b>21</b> + argon                  | 11  | DNA + UVB + <b>21</b> + 250 $\mu$ M KI         |
| 4   | DNA + UVB + <b>21</b> + 1500 $\mu$ M cyst      | 12  | DNA + UVB + <b>21</b> + 20 mM NaN <sub>3</sub> |
| 5   | DNA + UVB + <b>21</b> + 250 $\mu$ M KI         | 13  | DNA + UVB + <b>21</b> + D <sub>2</sub> O       |
| 6   | DNA + UVB + <b>21</b> + 20 mM NaN <sub>3</sub> | 14  | DNA + UVB + <b>21</b> + 20% DMSO               |
| 7   | DNA + UVB + <b>21</b> + D <sub>2</sub> O       | 15  | Mannitol 750 $\mu$ M control                   |
| 8   | DNA + UVB + <b>21</b> + 20% DMSO               | 16  | DNA + UVB + <b>21</b> + 750 $\mu$ M Mannitol   |

**365 nm**

**1. 365nm, 10cm, 120 min, tris pH=6.8, C= 100 µM**

The values of the present gel are incorporated in plots of Figure 5. The whole gel except lane 14 is found in SI, S.3.D.

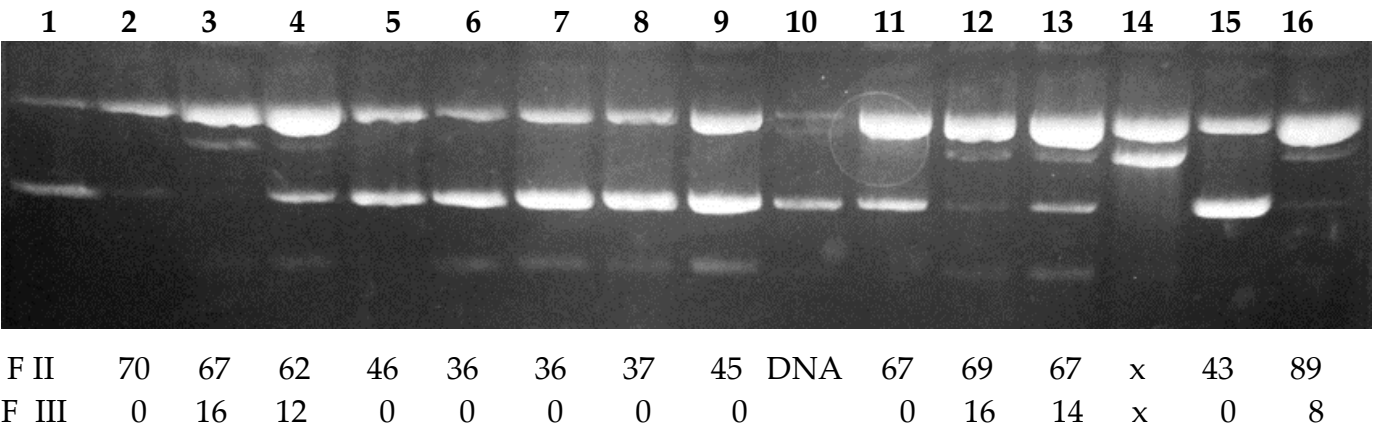

| a/a | description    | a/a | description    |
|-----|----------------|-----|----------------|
| 1   | DNA + UVA      | 10  | DNA + UVA      |
| 2   | DNA + UVA + 23 | 11  | DNA + UVA + 16 |
| 3   | DNA + UVA + 22 | 12  | DNA + UVA + 17 |
| 4   | DNA + UVA + 24 | 13  | DNA + UVA + 18 |
| 5   | DNA + UVA + 25 | 14  | Irrelevant (x) |
| 6   | DNA + UVA + 26 | 15  | DNA + UVA + 32 |
| 7   | DNA + UVA + 27 | 16  | DNA + UVA + 21 |
| 8   | DNA + UVA + 28 |     |                |
| 9   | DNA + UVA + 29 |     |                |

**2. 365nm, 10cm, 120 min, tris pH=6.8, C= 100 µM**

The values of the present gel are incorporated in plots of Figure 5. pBluescript SK II was used in this experiment.

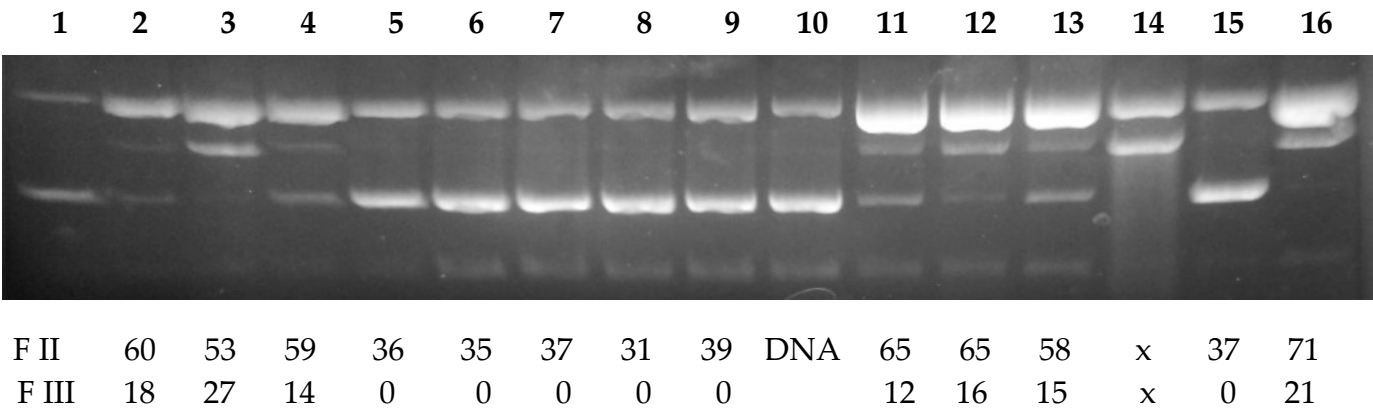

| a/a | description    | a/a | description    |
|-----|----------------|-----|----------------|
| 1   | DNA + UVA      | 10  | DNA + UVA      |
| 2   | DNA + UVA + 23 | 11  | DNA + UVA + 16 |
| 3   | DNA + UVA + 22 | 12  | DNA + UVA + 17 |
| 4   | DNA + UVA + 24 | 13  | DNA + UVA + 18 |
| 5   | DNA + UVA + 25 | 14  | Irrelevant (x) |



|   |                       |    |                       |
|---|-----------------------|----|-----------------------|
| 6 | DNA + UVA + <b>26</b> | 15 | DNA + UVA + <b>32</b> |
| 7 | DNA + UVA + <b>27</b> | 16 | DNA + UVA + <b>21</b> |
| 8 | DNA + UVA + <b>28</b> |    |                       |
| 9 | DNA + UVA + <b>29</b> |    |                       |

### 3. 365nm, 10cm, 120 min, tris pH=6.8, C= 100 µM

The values of the present gel are incorporated in plots of Figure 5. pBluescript SK II was used in this experiment.

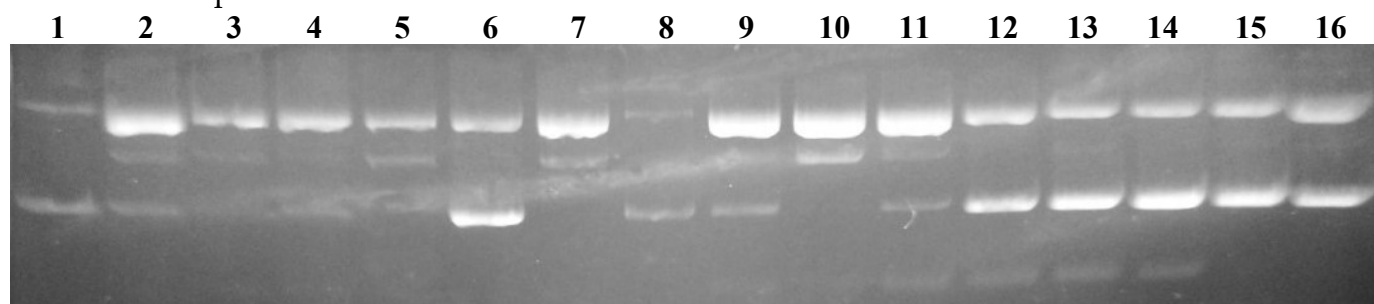

|       |    |    |    |   |    |    |     |    |    |    |    |    |    |    |    |
|-------|----|----|----|---|----|----|-----|----|----|----|----|----|----|----|----|
| F II  | 60 | 49 | 41 | x | 37 | 48 | DNA | 44 | 46 | 55 | 47 | 39 | 34 | 33 | 47 |
| F III | 14 | 3  | 1  | x | 0  | 16 |     | 2  | 15 | 5  | 0  | 0  | 0  | 0  | 0  |

| a/a | description           | a/a | description           |
|-----|-----------------------|-----|-----------------------|
| 1   | DNA + UVA             | 8   | DNA + UVA             |
| 2   | DNA + UVA + <b>16</b> | 9   | DNA + UVA + <b>23</b> |
| 3   | DNA + UVA + <b>17</b> | 10  | DNA + UVA + <b>22</b> |
| 4   | DNA + UVA + <b>18</b> | 11  | DNA + UVA + <b>24</b> |
| 5   | Irrelevant (x)        | 12  | DNA + UVA + <b>25</b> |
| 6   | DNA + UVA + <b>32</b> | 13  | DNA + UVA + <b>26</b> |
| 7   | DNA + UVA + <b>21</b> | 14  | DNA + UVA + <b>27</b> |
|     |                       | 15  | DNA + UVA + <b>28</b> |
|     |                       | 16  | DNA + UVA + <b>29</b> |
